# Supplementary material for: PAIRUP-MS: Pathway analysis and imputation to relate unknowns in profiles from mass spectrometry-based metabolite data
Source: PubMed Central journal article supplement (PMC6347288; doi:10.1371/journal.pcbi.1006734), 2019-01-14
Supplement: pcbi.1006734.s001.pdf [file pcbi.1006734.s001.pdf]

**Broad Metabolomics Platform (see S1 Text)**

LC-MS profiling

Signal peak detection and alignment  
(using Progenesis Q1)

Targeted metabolite identification  
(using TraceFinder)

**PAIRUP-MS Data Processing (see S2-S3 Text)**

Normalization using internal standards  
and pooled samples

Removal of outlier data points and  
signals with noisy trends

Removal of samples and signals  
based on % missingness

Missing value imputation  
(using MICE)

Covariate adjustment  
(when appropriate)

Rank-based inverse normal  
transformation

Performed on each  
metabolite signal in each  
profiling method

Performed on merged  
dataset containing data  
from all methods

**PAIRUP-MS Imputation-based  
Matching Method**

**PAIRUP-MS Pathway Annotation  
and Analysis Method**
