# Supplementary material for: PAIRUP-MS: Pathway analysis and imputation to relate unknowns in profiles from mass spectrometry-based metabolite data
Source: PubMed Central journal article supplement (PMC6347288; doi:10.1371/journal.pcbi.1006734), 2019-01-14

OE vs. MCDS Known Metabolite Pairwise Correlations

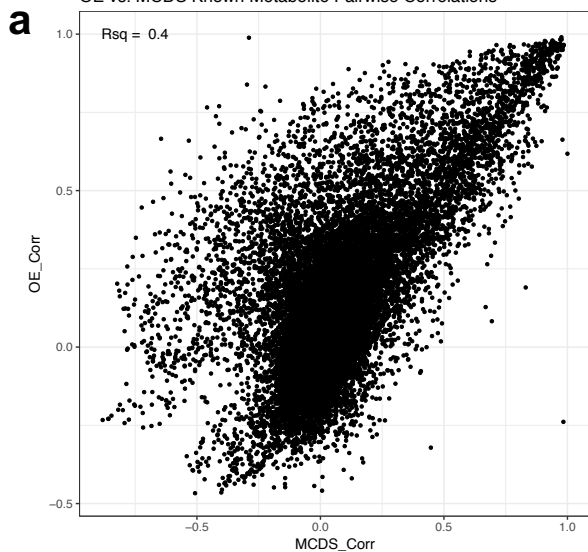

OE vs. BioAge Known Metabolite Pairwise Correlations

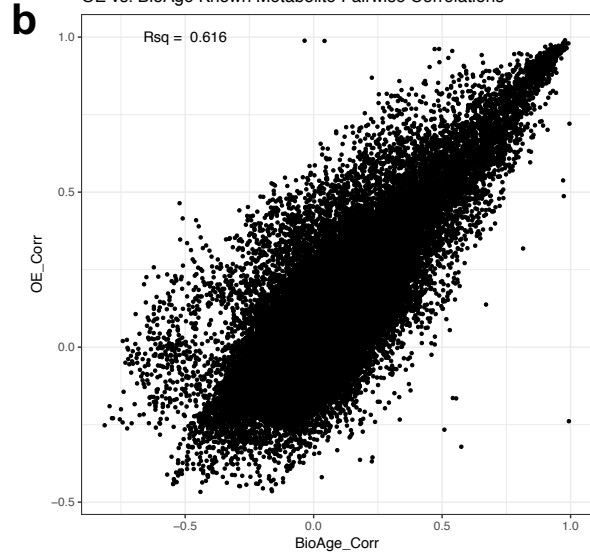

MCDS vs. BioAge Known Metabolite Pairwise Correlations

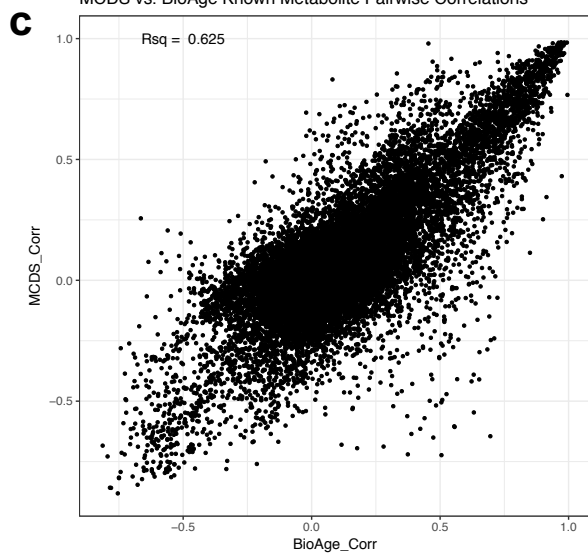

Supplement: pcbi.1006734.s002.pdf [file pcbi.1006734.s002.pdf]
