# Supplementary material for: PAIRUP-MS: Pathway analysis and imputation to relate unknowns in profiles from mass spectrometry-based metabolite data
Source: PubMed Central journal article supplement (PMC6347288; doi:10.1371/journal.pcbi.1006734), 2019-01-14

**a**Adduct Ion Approach —●— No Adduct —▲— Adduct —■— Combined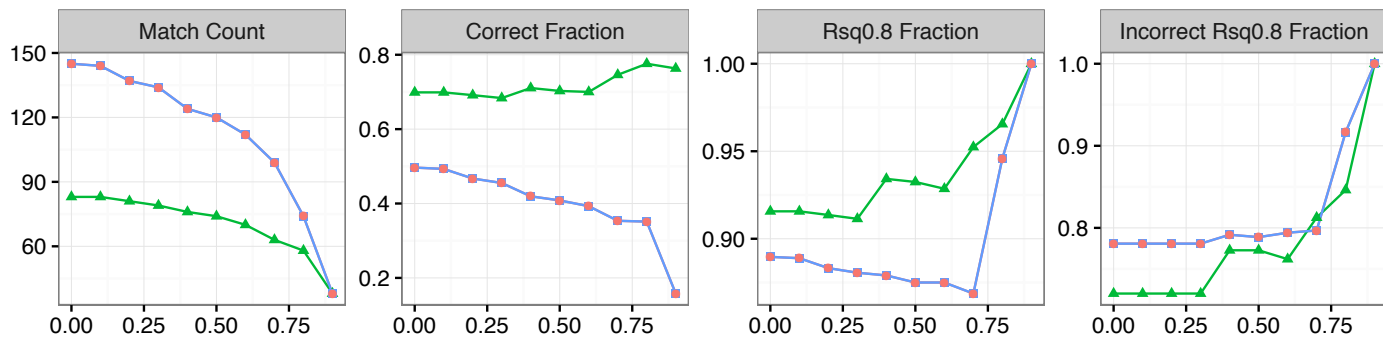**b**Correlation Approach —●— Dataset1 Correlation —▲— Dataset2 Correlation —■— All Correlation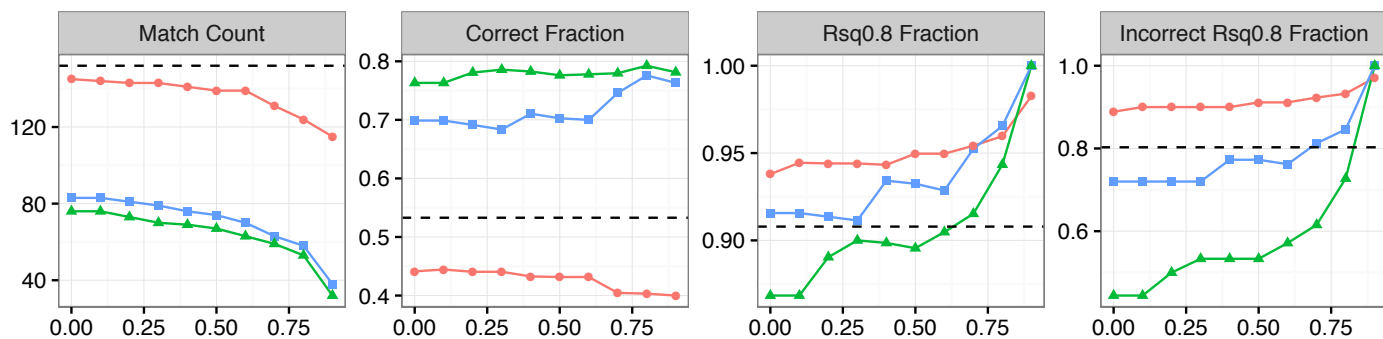**c**Match Type —●— Multiple —▲— Unique —■— Reciprocal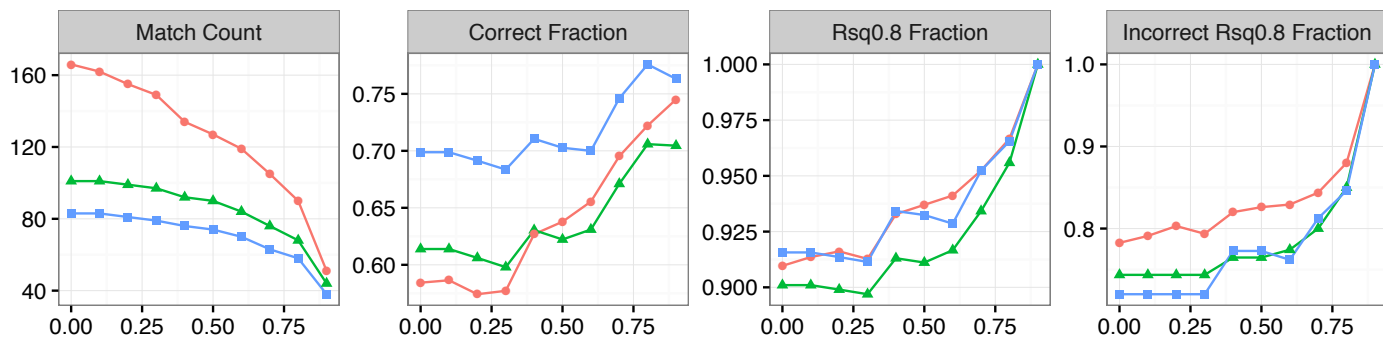**d**Partition Approach —●— Within Method —▲— Across Method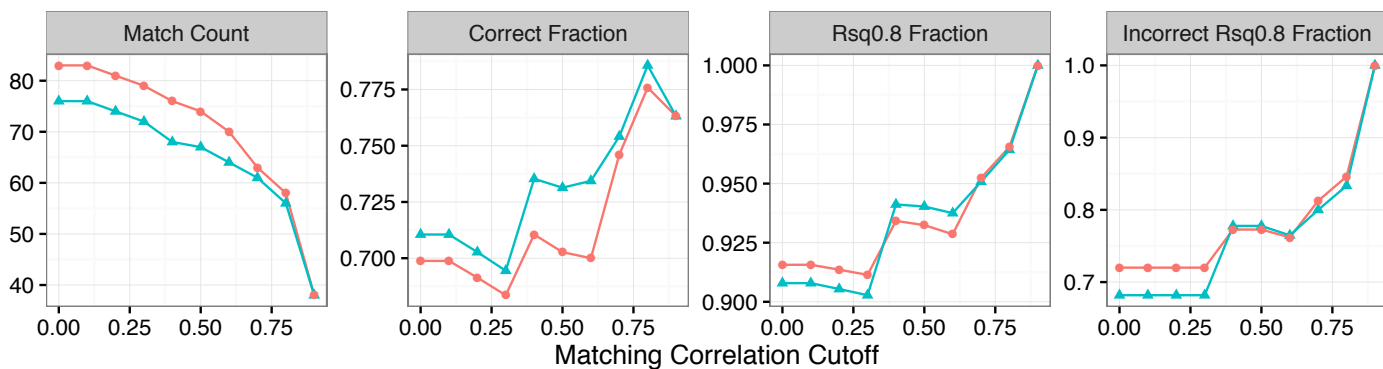

Supplement: pcbi.1006734.s003.pdf [file pcbi.1006734.s003.pdf]
