# Supplementary material for: PAIRUP-MS: Pathway analysis and imputation to relate unknowns in profiles from mass spectrometry-based metabolite data
Source: PubMed Central journal article supplement (PMC6347288; doi:10.1371/journal.pcbi.1006734), 2019-01-14

Pair Type ● Shared Known ▲ Matched (reciprocal) ■ Matched (multiple) + Random

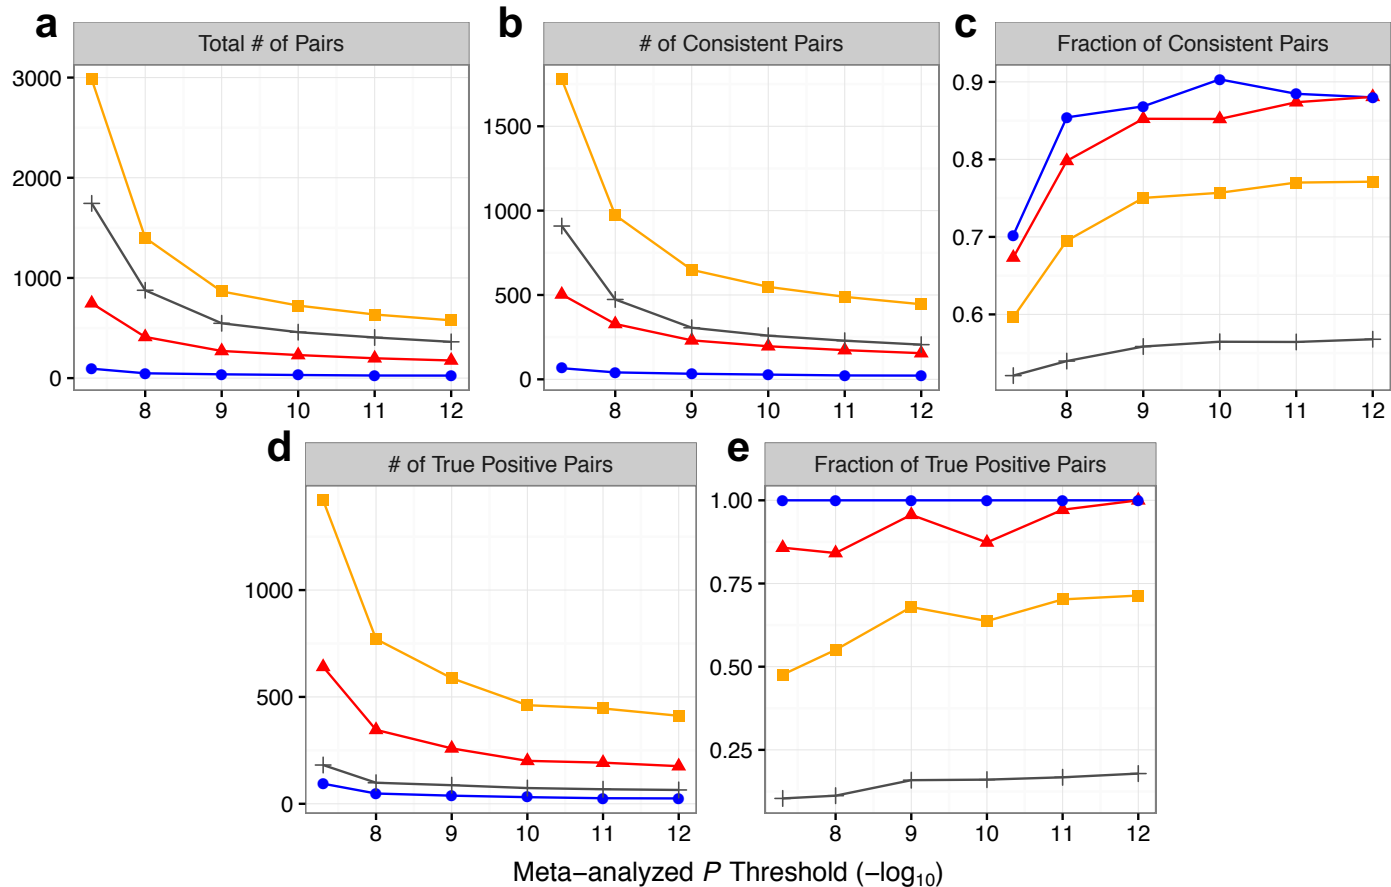

Supplement: pcbi.1006734.s007.pdf [file pcbi.1006734.s007.pdf]
