# Supplementary material for: PAIRUP-MS: Pathway analysis and imputation to relate unknowns in profiles from mass spectrometry-based metabolite data
Source: PubMed Central journal article supplement (PMC6347288; doi:10.1371/journal.pcbi.1006734), 2019-01-14

**a** Cumulative Variance and Cronbach's Alpha for MCs

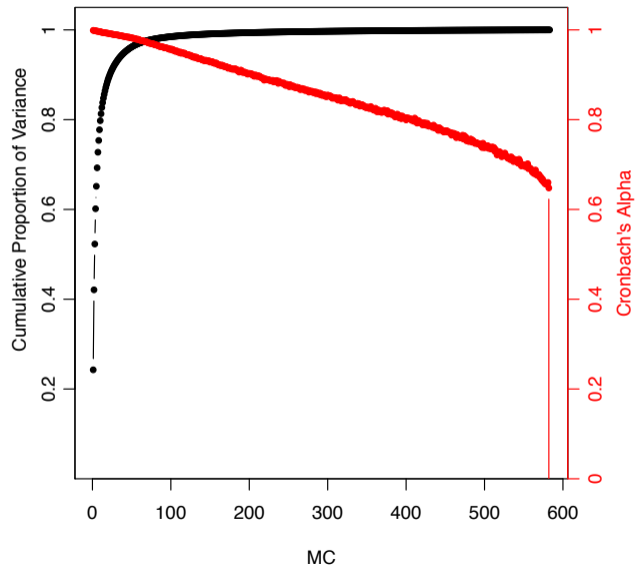

**b** Significant Metabolite Sets (5% FDR) per MC

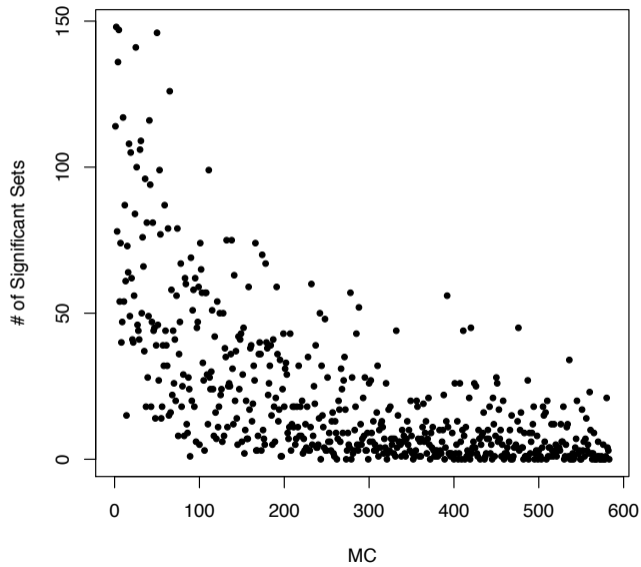

Supplement: pcbi.1006734.s008.pdf [file pcbi.1006734.s008.pdf]
