# Supplementary material for: PAIRUP-MS: Pathway analysis and imputation to relate unknowns in profiles from mass spectrometry-based metabolite data
Source: PubMed Central journal article supplement (PMC6347288; doi:10.1371/journal.pcbi.1006734), 2019-01-14
Supplement: pcbi.1006734.s011.pdf [file pcbi.1006734.s011.pdf]

**a**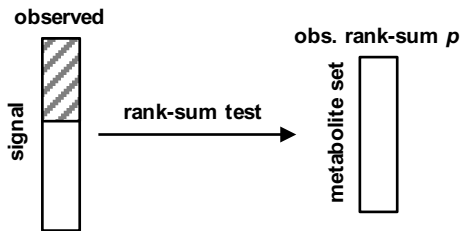**b**

permutation round 1:

null x 1000

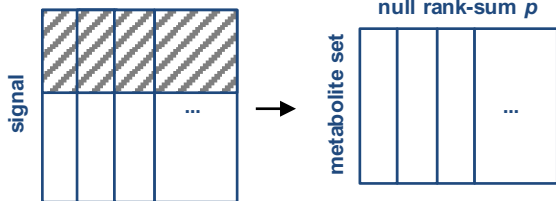

permutation round 2:

null x 20

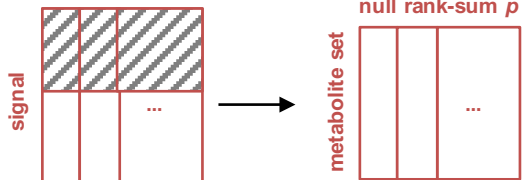obs. perm.  $p$ 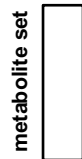null perm.  $p$ 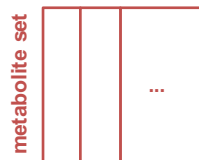**c**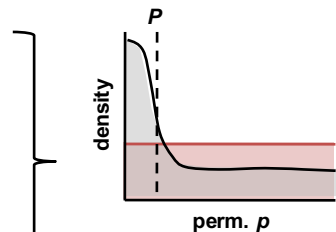

$$\text{FDR}_p = \frac{\text{avg. \# of null perm. } p < P}{\text{\# of obs. perm. } p < P}$$
