# Supplementary material for: PAIRUP-MS: Pathway analysis and imputation to relate unknowns in profiles from mass spectrometry-based metabolite data
Source: PubMed Central journal article supplement (PMC6347288; doi:10.1371/journal.pcbi.1006734), 2019-01-14
Supplement: pcbi.1006734.s015.pdf [file pcbi.1006734.s015.pdf]

**S4 Table. Calibration statistics for BioAge signal-metabolite set annotation matrix.**

| Parameter settings |                      | Calibration statistics |                     |                        |
|--------------------|----------------------|------------------------|---------------------|------------------------|
| Metabolites        | MCs                  | AUC                    | # of confident sets | AUC for confident sets |
| >= 2               | top 50               | 0.772                  | 469                 | 0.793                  |
| >= 2               | top 100              | 0.802                  | 483                 | 0.824                  |
| >= 2               | top 583              | 0.837                  | 467                 | 0.856                  |
| >= 2               | 1% FDR (353)         | 0.840                  | 488                 | 0.858                  |
| <b>&gt;= 2*</b>    | <b>5% FDR (541)*</b> | <b>0.839</b>           | <b>472</b>          | <b>0.859</b>           |
| >= 5               | top 50               | 0.774                  | 361                 | 0.789                  |
| >= 5               | top 100              | 0.806                  | 366                 | 0.821                  |
| >= 5               | top 583              | 0.839                  | 364                 | 0.851                  |
| >= 5               | 1% FDR (351)         | 0.841                  | 372                 | 0.852                  |
| >= 5               | 5% FDR (531)         | 0.842                  | 366                 | 0.854                  |
| >= 10              | top 50               | 0.769                  | 245                 | 0.781                  |
| >= 10              | top 100              | 0.803                  | 251                 | 0.814                  |
| >= 10              | top 583              | 0.839                  | 252                 | 0.847                  |
| >= 10              | 1% FDR (318)         | 0.838                  | 251                 | 0.846                  |
| >= 10              | 5% FDR (485)         | 0.845                  | 250                 | 0.853                  |

“Metabolites”: minimum number of metabolites required for including a metabolite set for reconstitution; “MCs”: which MCs to use for reconstitution (see Methods), with number of MCs shown in parentheses for FDR-filtered MCs; “AUC”: area under the ROC curve (generated by using annotation matrix values to classify known metabolites into their original metabolite sets); “confident sets”: metabolite sets with label confidence scores (post-reconstitution rank-sum  $p$ ) < 0.05. \* Optimal parameter settings used for final BioAge annotation matrix, which yielded highest AUC for confident sets.
