# Supplementary material for: PAIRUP-MS: Pathway analysis and imputation to relate unknowns in profiles from mass spectrometry-based metabolite data
Source: PubMed Central journal article supplement (PMC6347288; doi:10.1371/journal.pcbi.1006734), 2019-01-14
Supplement: pcbi.1006734.s016.pdf [file pcbi.1006734.s016.pdf]

**S5 Table. Summary of genetic validation of BioAge pathway annotations.**

| Significance threshold | # of loci with relevant enriched pathways |           |             | Empirical $p$ |
|------------------------|-------------------------------------------|-----------|-------------|---------------|
|                        | Observed                                  | Mean null | Median null |               |
| 0.05                   | 13                                        | 6.8       | 6           | 0.1           |
| 0.025                  | 10                                        | 3.35      | 2.5         | 0.05          |
| 0.01                   | 5                                         | 0.85      | 1           | < 0.05        |
| 0.005                  | 4                                         | 0.3       | 0           | < 0.05        |
| 0.001                  | 2                                         | 0.5       | 0           | < 0.05        |

“Significance threshold”: permutation  $p$ -value threshold used to define metabolite set/pathway enrichment; “# of loci with relevant enriched pathways”: number of loci in which the SNP-associated signals were enriched for  $\geq 1$  pathway linked to the affected gene. Mean and median null statistics and empirical  $p$ -values were calculated using 20 null permutations (see Methods).
