# Supplementary material for: PAIRUP-MS: Pathway analysis and imputation to relate unknowns in profiles from mass spectrometry-based metabolite data
Source: PubMed Central journal article supplement (PMC6347288; doi:10.1371/journal.pcbi.1006734), 2019-01-14
Supplement: pcbi.1006734.s024.pdf [file pcbi.1006734.s024.pdf]

**S13 Table. (a) Rules for checking for m/z agreement between 2 ions.**

| Ion Mode 1 | Ion Mode 2 | Setting   | <i>d</i>                                                         |
|------------|------------|-----------|------------------------------------------------------------------|
| Positive   | Positive   | No adduct | 0                                                                |
| Positive   | Positive   | Adduct    | 0 and pairwise m/z differences between the positive ions         |
| Negative   | Negative   | No adduct | 0                                                                |
| Negative   | Negative   | Adduct    | 0 and pairwise m/z differences between the negative ions         |
| Positive   | Negative   | No adduct | m/z difference between [M+H] <sup>+</sup> and [M-H] <sup>-</sup> |
| Positive   | Negative   | Adduct    | m/z differences between each pair of positive and negative ions  |
| Negative   | Positive   | No adduct | m/z difference between [M-H] <sup>-</sup> and [M+H] <sup>+</sup> |
| Negative   | Positive   | Adduct    | m/z differences between each pair of negative and positive ions  |

**S13 Table. (b) m/z values of different adduct ions included in “adduct” settings.**

| Ion Mode | Ion                               | m/z value [1]        |
|----------|-----------------------------------|----------------------|
| Positive | M <sup>+</sup>                    | <i>m</i>             |
|          | [M+H] <sup>+</sup>                | <i>m</i> + 1.007276  |
|          | [M+NH <sub>4</sub> ] <sup>+</sup> | <i>m</i> + 18.033823 |
|          | [M+Na] <sup>+</sup>               | <i>m</i> + 22.989218 |
| Negative | [M-H] <sup>-</sup>                | <i>m</i> – 1.007276  |

*m* is the mass of the analyte molecule M. Additional or alternative adduct ions may be specified when running the m/z checking algorithm (see documentation on <https://github.com/yuhanhsu/PAIRUP-MS>).

## References

1. Huang N, Siegel MM, Kruppa GH, Laukien FH. Automation of a Fourier transform ion cyclotron resonance mass spectrometer for acquisition, analysis, and e-mailing of high-resolution exact-mass electrospray ionization mass spectral data. *Journal of the American Society for Mass Spectrometry*. 1999;10(11):1166-73. doi: 10.1016/s1044-0305(99)00089-6.
