# Supplementary material for: PAIRUP-MS: Pathway analysis and imputation to relate unknowns in profiles from mass spectrometry-based metabolite data
Source: PLoS Comput Biol. 2019 Jan 14;15(1):e1006734. doi: 10.1371/journal.pcbi.1006734 (PMC6347288; doi:10.1371/journal.pcbi.1006734)
Supplement: S1 Table — “NA”: m/z and RT information not available. (XLSX) [file pcbi.1006734.s012.xlsx]

## Sheet: S1 Table
S1 Table. Known metabolites included in QC’ed OE, MCDS, and BioAge metabolite data.
Dataset	Metabolite	Profiling method	m/z	RT (min)
OE	C16:1_LPC	C8-pos	494.324	4.67
OE	C16:0_LPC	C8-pos	496.34	5.04
OE	C18:2_LPC	C8-pos	520.339	4.87
OE	C18:1_LPC	C8-pos	522.355	5.23
OE	C18:0_LPC	C8-pos	524.371	5.64
OE	C20:5_LPC	C8-pos	542.322	4.75
OE	C20:4_LPC	C8-pos	544.34	4.9
OE	C20:3_LPC	C8-pos	518.322	5.04
OE	C22:6_LPC	C8-pos	568.34	4.88
OE	C16:0_LPE	C8-pos	454.293	5.07
OE	C18:2_LPE	C8-pos	478.293	4.89
OE	C20:4_LPE	C8-pos	502.293	4.92
OE	C22:6_LPE	C8-pos	526.293	4.89
OE	C30:0_PC	C8-pos	706.538	8.38
OE	C32:2_PC	C8-pos	730.537	8.21
OE	C32:1_PC	C8-pos	732.553	8.54
OE	C32:0_PC	C8-pos	734.569	8.84
OE	C34:4_PC	C8-pos	754.537	8.24
OE	C34:3_PC	C8-pos	756.553	8.41
OE	C34:2_PC	C8-pos	758.569	8.69
OE	C34:1_PC	C8-pos	760.584	8.99
OE	C34:0_PC	C8-pos	762.601	9.3
OE	C36:4_PC-A	C8-pos	782.569	8.5
OE	C36:4_PC-B	C8-pos	782.568	8.71
OE	C36:3_PC	C8-pos	784.584	8.84
OE	C36:2_PC	C8-pos	786.599	9.14
OE	C36:1_PC	C8-pos	788.615	9.41
OE	C36:0_PC	C8-pos	790.632	9.79
OE	C38:6_PC	C8-pos	806.568	8.66
OE	C38:4_PC	C8-pos	810.599	9.15
OE	C38:3_PC	C8-pos	812.615	9.28
OE	C38:2_PC	C8-pos	814.631	9.49
OE	C40:10_PC	C8-pos	826.535	8.35
OE	C40:9_PC	C8-pos	828.551	8.64
OE	C40:6_PC	C8-pos	834.599	9.1
OE	C34:1_PC_plasmalogen-A	C8-pos	746.605	9.27
OE	C36:5_PC_plasmalogen-A	C8-pos	766.573	8.75
OE	C36:5_PC_plasmalogen-B	C8-pos	766.572	8.99
OE	C36:4_PC_plasmalogen	C8-pos	768.588	9
OE	C36:3_PC_plasmalogen	C8-pos	770.604	9.13
OE	C36:2_PC_plasmalogen	C8-pos	772.621	9.42
OE	C36:1_PC_plasmalogen	C8-pos	774.635	9.7
OE	C38:7_PC_plasmalogen	C8-pos	790.572	9
OE	C38:6_PC_plasmalogen	C8-pos	792.588	9.11
OE	C38:4_PC_plasmalogen	C8-pos	796.621	9.44
OE	C40:7_PC_plasmalogen	C8-pos	818.603	9.44
OE	C34:0_PE	C8-pos	720.553	8.62
OE	C36:3_PE	C8-pos	742.537	8.84
OE	C36:2_PE	C8-pos	744.554	9.14
OE	C36:1_PE	C8-pos	746.569	9.41
OE	C38:6_PE	C8-pos	764.522	8.66
OE	C38:5_PE	C8-pos	766.539	8.83
OE	C38:4_PE	C8-pos	768.554	9.15
OE	C40:6_PE	C8-pos	792.555	9.19
OE	C36:5_PE_plasmalogen	C8-pos	724.527	9
OE	C36:4_PE_plasmalogen	C8-pos	726.542	9.11
OE	C36:3_PE_plasmalogen	C8-pos	728.558	9.42
OE	C38:7_PE_plasmalogen	C8-pos	748.527	8.92
OE	C38:5_PE_plasmalogen	C8-pos	752.558	9.42
OE	C40:7_PE_plasmalogen	C8-pos	776.558	9.36
OE	C22:0_Ceramide_(d18:1)	C8-pos	622.613	9.89
OE	C24:0_Ceramide_(d18:1)	C8-pos	650.644	10.29
OE	C24:1_Ceramide_(d18:1)	C8-pos	648.629	9.94
OE	C14:0_SM	C8-pos	675.543	7.93
OE	C16:1_SM	C8-pos	701.559	8.07
OE	C16:0_SM	C8-pos	703.574	8.43
OE	C18:2_SM	C8-pos	749.557	8.3
OE	C18:1_SM	C8-pos	729.59	8.59
OE	C18:0_SM	C8-pos	731.605	8.91
OE	C20:0_SM	C8-pos	759.637	9.39
OE	C22:1_SM	C8-pos	785.653	9.49
OE	C22:0_SM	C8-pos	787.668	9.77
OE	C24:1_SM	C8-pos	813.684	9.82
OE	C24:0_SM	C8-pos	815.699	10.18
OE	C14:0_CE	C8-pos	614.587	11.82
OE	C16:1_CE	C8-pos	640.602	11.91
OE	C16:0_CE	C8-pos	642.618	12.23
OE	C18:3_CE	C8-pos	664.602	11.74
OE	C18:2_CE	C8-pos	666.618	11.99
OE	C18:1_CE	C8-pos	668.633	12.31
OE	C18:0_CE	C8-pos	670.649	12.71
OE	C20:5_CE	C8-pos	688.602	11.6
OE	C20:4_CE	C8-pos	690.617	11.85
OE	C20:3_CE	C8-pos	692.633	12.13
OE	C22:6_CE	C8-pos	714.617	11.72
OE	C22:5_CE	C8-pos	716.633	11.95
OE	C16:1_MAG	C8-pos	346.295	5.26
OE	C18:0_MAG	C8-pos	376.342	6.09
OE	C32:0_DAG	C8-pos	591.496	9.35
OE	C34:2_DAG	C8-pos	610.54	9.19
OE	C34:1_DAG	C8-pos	612.556	9.47
OE	C34:0_DAG	C8-pos	614.571	9.8
OE	C36:3_DAG	C8-pos	636.556	9.32
OE	C36:2_DAG	C8-pos	638.571	9.6
OE	C36:1_DAG	C8-pos	640.587	9.89
OE	C36:0_DAG	C8-pos	642.602	10.2
OE	C36:4_DAG	C8-pos	634.54	9.03
OE	C42:0_TAG	C8-pos	740.676	11.13
OE	C44:2_TAG	C8-pos	764.676	10.96
OE	C44:1_TAG	C8-pos	766.691	11.23
OE	C44:0_TAG	C8-pos	768.707	11.47
OE	C46:3_TAG	C8-pos	790.691	11.06
OE	C46:2_TAG	C8-pos	792.707	11.31
OE	C46:1_TAG	C8-pos	794.722	11.57
OE	C46:0_TAG	C8-pos	796.738	11.81
OE	C48:5_TAG	C8-pos	814.691	10.98
OE	C48:4_TAG	C8-pos	816.707	11.16
OE	C48:3_TAG	C8-pos	818.722	11.4
OE	C48:2_TAG	C8-pos	820.738	11.65
OE	C48:1_TAG	C8-pos	822.753	11.9
OE	C48:0_TAG	C8-pos	824.769	12.16
OE	C50:6_TAG	C8-pos	840.707	11.16
OE	C50:5_TAG	C8-pos	842.722	11.26
OE	C50:4_TAG	C8-pos	844.738	11.5
OE	C50:3_TAG	C8-pos	846.753	11.75
OE	C50:2_TAG	C8-pos	848.768	11.99
OE	C50:1_TAG	C8-pos	850.785	12.24
OE	C50:0_TAG	C8-pos	852.8	12.52
OE	C52:7_TAG	C8-pos	866.724	11.28
OE	C52:6_TAG	C8-pos	868.738	11.5
OE	C52:5_TAG	C8-pos	870.753	11.6
OE	C52:4_TAG	C8-pos	872.769	11.84
OE	C52:3_TAG	C8-pos	874.784	12.08
OE	C52:2_TAG	C8-pos	876.8	12.35
OE	C52:1_TAG	C8-pos	878.816	12.61
OE	C52:0_TAG	C8-pos	880.832	12.92
OE	C54:8_TAG	C8-pos	892.739	11.34
OE	C54:7_TAG	C8-pos	894.754	11.6
OE	C54:6_TAG	C8-pos	896.769	11.81
OE	C54:5_TAG	C8-pos	898.784	11.94
OE	C54:4_TAG	C8-pos	900.801	12.19
OE	C54:3_TAG	C8-pos	902.816	12.44
OE	C54:2_TAG	C8-pos	904.832	12.7
OE	C54:1_TAG	C8-pos	906.848	12.99
OE	C56:9_TAG	C8-pos	918.755	11.47
OE	C56:8_TAG	C8-pos	920.769	11.71
OE	C56:7_TAG	C8-pos	922.784	11.94
OE	C56:6_TAG	C8-pos	924.802	12.2
OE	C56:5_TAG	C8-pos	926.813	12.4
OE	C56:4_TAG	C8-pos	928.831	12.53
OE	C56:3_TAG	C8-pos	930.847	12.79
OE	C56:2_TAG	C8-pos	932.863	13.08
OE	C56:1_TAG	C8-pos	934.878	13.43
OE	C58:11_TAG	C8-pos	942.754	11.42
OE	C58:10_TAG	C8-pos	944.769	11.58
OE	C58:9_TAG	C8-pos	946.784	11.81
OE	C58:8_TAG	C8-pos	948.801	12.05
OE	C58:7_TAG	C8-pos	950.816	12.29
OE	C58:6_TAG	C8-pos	952.833	12.45
OE	C60:12_TAG	C8-pos	968.767	11.58
OE	C34:1_PI	C8-pos	837.548	8.8
OE	C34:0_PI	C8-pos	839.564	9.1
OE	C38:4_PI	C8-pos	887.564	9
OE	C34:0_PS	C8-pos	764.543	8.5
OE	C14:0_LPC	C8-pos	468.308	4.51
OE	Myristic_acid	C18-neg	227.201	11.55
OE	Palmitoleic_acid	C18-neg	253.217	11.81
OE	Palmitic_acid	C18-neg	255.233	12.62
OE	Gamma-Linolenic_acid	C18-neg	277.217	11.46
OE	Linoleic_acid	C18-neg	279.233	12.09
OE	Oleic_acid	C18-neg	281.248	12.79
OE	Stearic_acid	C18-neg	283.264	13.59
OE	Eicosapentaenoic_acid	C18-neg	301.217	11.36
OE	Arachidonic_acid	C18-neg	303.233	11.96
OE	8.11.14-Eicosatrienoic_acid	C18-neg	305.248	12.64
OE	Docosahexaenoic_acid	C18-neg	327.233	11.79
OE	Docosapentaenoic_acid	C18-neg	329.248	12.1
OE	Adrenic_acid	C18-neg	331.263	12.39
OE	LTB4	C18-neg	335.223	7.93
OE	Sphingosine_1-Phosphate	C18-neg	378.242	8.07
OE	Deoxycholic_acid/Chenodeoxycholic_acid	C18-neg	391.285	8.77
OE	Cholic_acid	C18-neg	407.28	6.66
OE	Glycolithocholic_acid	C18-neg	432.312	8.86
OE	Glycoursodeoxycholic_acid	C18-neg	448.307	3.78
OE	Glycodeoxycholic_acid	C18-neg	448.307	7.21
OE	Glycochenodeoxycholic_acid	C18-neg	448.307	6.87
OE	Glycocholic_acid	C18-neg	464.302	3.81
OE	1-methylhistamine	HILIC-pos	126.103	9.85
OE	1-methylnicotinamide	HILIC-pos	137.071	8.41
OE	3-hydroxyanthranilic_acid	HILIC-pos	154.05	1.9
OE	5-hydroxytryptophan	HILIC-pos	221.093	6.31
OE	acetylcholine	HILIC-pos	146.118	8.92
OE	adenosine	HILIC-pos	268.106	5.25
OE	ADMA	HILIC-pos	203.15	10
OE	alanine	HILIC-pos	90.0558	8.04
OE	allantoin	HILIC-pos	159.052	3.79
OE	alpha-glycerophosphocholine	HILIC-pos	258.111	10.85
OE	aminoisobutyric_acid	HILIC-pos	104.071	7.85
OE	arginine	HILIC-pos	175.119	9.45
OE	asparagine	HILIC-pos	133.061	8.27
OE	betaine	HILIC-pos	118.087	9.19
OE	C10_carnitine	HILIC-pos	316.249	7.21
OE	C10:2_carnitine	HILIC-pos	312.217	7.35
OE	C12_carnitine	HILIC-pos	344.28	7.02
OE	C12:1_carnitine	HILIC-pos	342.264	7.05
OE	C14_carnitine	HILIC-pos	372.312	6.88
OE	C14:1_carnitine	HILIC-pos	370.296	6.87
OE	C14:2_carnitine	HILIC-pos	368.28	6.94
OE	C16_carnitine	HILIC-pos	400.343	6.76
OE	C18_carnitine	HILIC-pos	428.374	6.62
OE	C18:1_carnitine	HILIC-pos	426.358	6.65
OE	C18:2_carnitine	HILIC-pos	424.343	6.7
OE	C2_carnitine	HILIC-pos	204.124	8.81
OE	C20_carnitine	HILIC-pos	456.404	6.54
OE	C26_carnitine	HILIC-pos	540.5	6.31
OE	C3_carnitine	HILIC-pos	218.139	8.42
OE	C3-DC-CH3_carnitine	HILIC-pos	262.129	8.7
OE	C4_carnitine	HILIC-pos	232.155	8.1
OE	C4-OH_carnitine	HILIC-pos	248.149	8.95
OE	C5_carnitine	HILIC-pos	246.17	7.86
OE	C5:1_carnitine	HILIC-pos	244.155	7.97
OE	C5-DC_carnitine	HILIC-pos	276.145	8.46
OE	C6_carnitine	HILIC-pos	260.186	7.65
OE	C7_carnitine	HILIC-pos	274.201	7.51
OE	C8_carnitine	HILIC-pos	288.217	7.42
OE	C9_carnitine	HILIC-pos	302.233	7.29
OE	carnitine	HILIC-pos	162.113	9.01
OE	choline	HILIC-pos	105.114	8.44
OE	cis-trans-hydroxyproline	HILIC-pos	132.066	8.15
OE	citrulline	HILIC-pos	176.103	8.62
OE	cotinine	HILIC-pos	177.103	5.17
OE	creatine	HILIC-pos	132.077	8.51
OE	creatinine	HILIC-pos	114.067	6.66
OE	cytosine	HILIC-pos	112.051	6.4
OE	dimethylglycine	HILIC-pos	104.071	8.77
OE	glutamate	HILIC-pos	148.061	7.85
OE	glutamine	HILIC-pos	147.077	8.3
OE	glycine	HILIC-pos	76.0402	8.19
OE	histamine	HILIC-pos	112.087	9.4
OE	histidine	HILIC-pos	156.077	9.73
OE	homocysteine	HILIC-pos	136.048	6.66
OE	hydroxyproline	HILIC-pos	132.065	7.21
OE	isoleucine	HILIC-pos	132.102	7.29
OE	kynurenic_acid	HILIC-pos	190.05	5.36
OE	leucine	HILIC-pos	132.102	7.16
OE	lysine	HILIC-pos	147.113	9.7
OE	methionine	HILIC-pos	150.058	8.9
OE	methionine_sulfoxide	HILIC-pos	166.053	1.94
OE	N-carbamoyl-beta-alanine	HILIC-pos	133.061	4.24
OE	niacinamide	HILIC-pos	123.056	3.91
OE	NMMA	HILIC-pos	189.135	9.65
OE	ornithine	HILIC-pos	133.098	9.64
OE	phenylalanine	HILIC-pos	166.087	6.9
OE	phosphocholine	HILIC-pos	185.08	12.9
OE	phosphoethanolamine	HILIC-pos	142.026	10
OE	proline	HILIC-pos	116.071	8.31
OE	putrescine	HILIC-pos	89.1078	7.8
OE	pyroglutamic_acid	HILIC-pos	130.05	7.84
OE	sarcosine	HILIC-pos	90.0555	9.9
OE	SDMA/ADMA	HILIC-pos	203.151	9.95
OE	serine	HILIC-pos	106.05	7.94
OE	serotonin	HILIC-pos	177.103	6.42
OE	taurine	HILIC-pos	126.022	9.8
OE	thiamine	HILIC-pos	266.12	7.9
OE	threonine	HILIC-pos	120.066	7.91
OE	thyroxine	HILIC-pos	777.694	8.1
OE	trimethylamine-N-oxide	HILIC-pos	76.0765	8.21
OE	tryptophan	HILIC-pos	205.097	6.67
OE	tyrosine	HILIC-pos	182.082	7.02
OE	valine	HILIC-pos	118.086	7.6
OE	xanthosine	HILIC-pos	285.08	4.53
OE	2-phosphoglycerate	HILIC-neg	NA	NA
OE	alpha-glycerophosphate	HILIC-neg	NA	NA
OE	4-pyridoxate	HILIC-neg	NA	NA
OE	aconitate	HILIC-neg	NA	NA
OE	adipate	HILIC-neg	NA	NA
OE	alpha-ketoglutarate	HILIC-neg	NA	NA
OE	AMP	HILIC-neg	NA	NA
OE	ADP	HILIC-neg	NA	NA
OE	cAMP	HILIC-neg	NA	NA
OE	citrate	HILIC-neg	NA	NA
OE	isocitrate	HILIC-neg	NA	NA
OE	CMP	HILIC-neg	NA	NA
OE	cystathionine	HILIC-neg	NA	NA
OE	cytidine	HILIC-neg	NA	NA
OE	hexose_monophosphate	HILIC-neg	NA	NA
OE	fructose/glucose/galactose	HILIC-neg	NA	NA
OE	hexose_diphosphate	HILIC-neg	NA	NA
OE	fumarate/maleate	HILIC-neg	NA	NA
OE	GDP	HILIC-neg	NA	NA
OE	glucuronate	HILIC-neg	NA	NA
OE	glutathione_oxidized	HILIC-neg	NA	NA
OE	GMP	HILIC-neg	NA	NA
OE	hippurate	HILIC-neg	NA	NA
OE	hypoxanthine	HILIC-neg	NA	NA
OE	IMP	HILIC-neg	NA	NA
OE	inosine	HILIC-neg	NA	NA
OE	kynurenine	HILIC-neg	NA	NA
OE	lactate	HILIC-neg	NA	NA
OE	lactose	HILIC-neg	NA	NA
OE	malate	HILIC-neg	NA	NA
OE	NAD	HILIC-neg	NA	NA
OE	orotate	HILIC-neg	NA	NA
OE	oxalate	HILIC-neg	NA	NA
OE	pantothenate	HILIC-neg	NA	NA
OE	PEP	HILIC-neg	NA	NA
OE	pentose_monophosphate	HILIC-neg	NA	NA
OE	salicylurate	HILIC-neg	NA	NA
OE	sorbitol	HILIC-neg	NA	NA
OE	succinate	HILIC-neg	NA	NA
OE	methylmalonate	HILIC-neg	NA	NA
OE	sucrose	HILIC-neg	NA	NA
OE	thymine	HILIC-neg	NA	NA
OE	UDP	HILIC-neg	NA	NA
OE	UDP-galactose/UDP-glucose	HILIC-neg	NA	NA
OE	UDP-glucuronate	HILIC-neg	NA	NA
OE	uracil	HILIC-neg	NA	NA
OE	urate	HILIC-neg	NA	NA
OE	uridine	HILIC-neg	NA	NA
OE	xanthine	HILIC-neg	NA	NA
OE	xanthurenate	HILIC-neg	NA	NA
OE	hydroxyphenylacetate	HILIC-neg	NA	NA
OE	indoxylsulfate	HILIC-neg	NA	NA
OE	indole-3-propionate	HILIC-neg	NA	NA
OE	gentisate	HILIC-neg	NA	NA
OE	phosphocreatine	HILIC-neg	NA	NA
OE	3-methyladipate/pimelate	HILIC-neg	NA	NA
OE	6-phosphogluconate	HILIC-neg	NA	NA
OE	alpha-hydroxybutyrate	HILIC-neg	NA	NA
OE	beta-hydroxybutyrate	HILIC-neg	NA	NA
OE	inositol	HILIC-neg	NA	NA
OE	MDA	HILIC-neg	NA	NA
MCDS	2-aminoadipate	CMH	NA	NA
MCDS	alpha-glycerophosphate	CMH	NA	NA
MCDS	4-pyridoxate	CMH	NA	NA
MCDS	aconitate	CMH	NA	NA
MCDS	adenine	CMH	NA	NA
MCDS	adipate	CMH	NA	NA
MCDS	citrate	CMH	NA	NA
MCDS	isocitrate	CMH	NA	NA
MCDS	cystathionine	CMH	NA	NA
MCDS	cytidine	CMH	NA	NA
MCDS	dCMP	CMH	NA	NA
MCDS	fumarate/maleate/alpha-ketoisovalerate	CMH	NA	NA
MCDS	glucuronate	CMH	NA	NA
MCDS	guanine	CMH	NA	NA
MCDS	guanosine	CMH	NA	NA
MCDS	hippurate	CMH	NA	NA
MCDS	hypoxanthine	CMH	NA	NA
MCDS	inosine	CMH	NA	NA
MCDS	kynurenine	CMH	NA	NA
MCDS	lactate	CMH	NA	NA
MCDS	lactose	CMH	NA	NA
MCDS	malate	CMH	NA	NA
MCDS	orotate	CMH	NA	NA
MCDS	oxalate	CMH	NA	NA
MCDS	pantothenate	CMH	NA	NA
MCDS	propionate	CMH	NA	NA
MCDS	pyruvate	CMH	NA	NA
MCDS	quinolinate	CMH	NA	NA
MCDS	salicylurate	CMH	NA	NA
MCDS	sorbitol	CMH	NA	NA
MCDS	succinate	CMH	NA	NA
MCDS	sucrose	CMH	NA	NA
MCDS	thymine	CMH	NA	NA
MCDS	uracil	CMH	NA	NA
MCDS	uridine	CMH	NA	NA
MCDS	xanthine	CMH	NA	NA
MCDS	glycocholate	CMH	NA	NA
MCDS	glycodeoxycholate/glycochenodeoxycholate	CMH	NA	NA
MCDS	taurodeoxycholate/taurochenodeoxycholate	CMH	NA	NA
MCDS	chenodeoxycholate/deoxycholate	CMH	NA	NA
MCDS	suberate	CMH	NA	NA
MCDS	hydroxyphenylacetate	CMH	NA	NA
MCDS	indolelactate	CMH	NA	NA
MCDS	indoxylsulfate	CMH	NA	NA
MCDS	indole-3-propionate	CMH	NA	NA
MCDS	gentisate	CMH	NA	NA
MCDS	phosphocreatine	CMH	NA	NA
MCDS	3-methyladipate/pimelate	CMH	NA	NA
MCDS	alpha-hydroxybutyrate	CMH	NA	NA
MCDS	beta-hydroxybutyrate	CMH	NA	NA
MCDS	2-hydroxyglutarate	CMH	NA	NA
MCDS	inositol	CMH	NA	NA
MCDS	butyrate	CMH	NA	NA
MCDS	1-methylnicotinamide	HILIC-pos	137.071	9.2
MCDS	5-hydroxytryptophan	HILIC-pos	221.092	7.11
MCDS	adenosine	HILIC-pos	268.104	5.61
MCDS	ADMA/SDMA	HILIC-pos	203.151	10.82
MCDS	alanine	HILIC-pos	90.0557	8.79
MCDS	alpha-glycerophosphocholine	HILIC-pos	258.11	11.6
MCDS	arginine	HILIC-pos	175.119	10.21
MCDS	asparagine	HILIC-pos	133.061	9.13
MCDS	betaine	HILIC-pos	118.087	9.86
MCDS	choline	HILIC-pos	104.108	9.24
MCDS	citrulline	HILIC-pos	176.103	9.33
MCDS	cotinine	HILIC-pos	177.103	5.43
MCDS	creatine	HILIC-pos	132.077	9.25
MCDS	creatinine	HILIC-pos	114.067	7.38
MCDS	cytosine	HILIC-pos	112.051	6.46
MCDS	dimethylglycine	HILIC-pos	104.071	9.45
MCDS	glucose	HILIC-pos	163.06	5.26
MCDS	glutamate	HILIC-pos	148.061	8.62
MCDS	glutamine	HILIC-pos	147.077	9.05
MCDS	glycine	HILIC-pos	76.0402	8.95
MCDS	isoleucine	HILIC-pos	132.102	8.1
MCDS	leucine	HILIC-pos	132.102	7.97
MCDS	lysine	HILIC-pos	147.113	10.43
MCDS	methionine	HILIC-pos	150.059	8.1
MCDS	niacinamide	HILIC-pos	123.056	3.46
MCDS	NMMA	HILIC-pos	189.135	10.22
MCDS	ornithine	HILIC-pos	133.097	10.38
MCDS	phenylalanine	HILIC-pos	166.087	7.76
MCDS	pipecolic_acid	HILIC-pos	130.087	8.91
MCDS	proline	HILIC-pos	116.071	9.04
MCDS	pyroglutamic_acid	HILIC-pos	130.05	9.05
MCDS	serine	HILIC-pos	106.05	8.73
MCDS	serotonin	HILIC-pos	177.102	7.22
MCDS	taurine	HILIC-pos	126.022	7.03
MCDS	threonine	HILIC-pos	120.066	8.74
MCDS	thyroxine	HILIC-pos	777.695	6.75
MCDS	trans-hydroxyproline	HILIC-pos	132.066	8.92
MCDS	trimethylamine-N-oxide	HILIC-pos	76.0766	9.04
MCDS	tryptophan	HILIC-pos	205.097	7.56
MCDS	tyrosine	HILIC-pos	182.082	7.84
MCDS	valine	HILIC-pos	118.087	8.41
MCDS	acetylcarnitine	HILIC-pos	204.123	9.69
MCDS	propionylcarnitine	HILIC-pos	218.139	9.31
MCDS	2-methylbutyroylcarnitine	HILIC-pos	246.17	8.74
MCDS	hexanoylcarnitine	HILIC-pos	260.186	8.51
MCDS	octanoylcarnitine	HILIC-pos	288.217	8.27
MCDS	nonanoylcarnitine	HILIC-pos	302.233	8.11
MCDS	decanoylcarnitine	HILIC-pos	316.248	8.05
MCDS	lauroylcarnitine	HILIC-pos	344.28	7.85
MCDS	14:1-carnitine	HILIC-pos	370.296	7.71
MCDS	myristoylcarnitine	HILIC-pos	372.311	7.71
MCDS	16:1-carnitine	HILIC-pos	398.327	7.63
MCDS	palmitoylcarnitine	HILIC-pos	400.343	7.6
MCDS	linoleylcarnitine	HILIC-pos	424.342	7.58
MCDS	oleoylcarnitine	HILIC-pos	426.358	7.53
MCDS	stearoylcarnitine	HILIC-pos	428.374	7.51
MCDS	poor_sig_histidine	HILIC-pos	156.077	10.36
MCDS	C14:0_LPC	LIPID	468.309	7.39
MCDS	C16:1_LPC	LIPID	494.324	7.58
MCDS	C16:0_LPC	LIPID	496.341	8.02
MCDS	C18:2_LPC	LIPID	520.339	7.79
MCDS	C18:1_LPC	LIPID	522.356	8.21
MCDS	C18:0_LPC	LIPID	524.371	8.8
MCDS	C20:5_LPC	LIPID	542.322	7.79
MCDS	C20:4_LPC	LIPID	544.339	7.79
MCDS	C20:3_LPC	LIPID	518.322	8.02
MCDS	C22:6_LPC	LIPID	568.34	7.79
MCDS	C16:1_LPE	LIPID	452.277	7.56
MCDS	C16:0_LPE	LIPID	454.293	8.02
MCDS	C18:2_LPE	LIPID	478.293	7.79
MCDS	C18:1_LPE	LIPID	480.308	8.21
MCDS	C18:0_LPE	LIPID	482.324	8.79
MCDS	C20:4_LPE	LIPID	502.293	7.79
MCDS	C22:6_LPE	LIPID	526.292	7.77
MCDS	C30:1_PC	LIPID	704.522	12.16
MCDS	C30:0_PC	LIPID	706.536	12.79
MCDS	C32:2_PC	LIPID	730.538	12.43
MCDS	C32:1_PC	LIPID	732.553	13.02
MCDS	C32:0_PC	LIPID	734.569	13.63
MCDS	C34:4_PC	LIPID	754.537	12.45
MCDS	C34:3_PC	LIPID	756.553	12.7
MCDS	C34:2_PC	LIPID	758.571	13.24
MCDS	C34:1_PC	LIPID	760.586	13.82
MCDS	C36:4_PC-A	LIPID	782.567	13.31
MCDS	C36:4_PC-B	LIPID	782.567	13.82
MCDS	C36:2_PC	LIPID	786.6	14.07
MCDS	C36:1_PC	LIPID	788.616	14.59
MCDS	C38:6_PC	LIPID	806.566	13.54
MCDS	C38:5_PC	LIPID	808.583	14.07
MCDS	C38:4_PC	LIPID	810.598	14.13
MCDS	C38:3_PC	LIPID	812.615	14.35
MCDS	C38:2_PC	LIPID	814.63	14.75
MCDS	C40:10_PC	LIPID	826.535	12.58
MCDS	C32:1_PE	LIPID	690.506	12.99
MCDS	C34:2_PE	LIPID	716.522	13.2
MCDS	C34:1_PE	LIPID	718.539	13.74
MCDS	C36:2_PE	LIPID	744.553	13.98
MCDS	C36:1_PE	LIPID	746.568	13.42
MCDS	C34:2_PI	LIPID	852.56	12.06
MCDS	C36:3_PI	LIPID	878.576	12.3
MCDS	C36:2_PI	LIPID	880.59	12.86
MCDS	C14:0_SM	LIPID	675.543	12.03
MCDS	C16:1_SM	LIPID	701.559	12.25
MCDS	C16:0_SM	LIPID	703.576	12.86
MCDS	C18:2_SM	LIPID	749.557	12.58
MCDS	C18:1_SM	LIPID	729.59	13.14
MCDS	C18:0_SM	LIPID	731.606	13.73
MCDS	C20:0_SM	LIPID	759.637	14.53
MCDS	C22:1_SM	LIPID	785.653	14.79
MCDS	C22:0_SM	LIPID	787.668	15.28
MCDS	C24:1_SM	LIPID	813.683	15.26
MCDS	C24:0_SM	LIPID	815.699	15.99
MCDS	C32:1_DAG	LIPID	589.48	13.63
MCDS	C32:2_DAG	LIPID	587.464	13.02
MCDS	C34:3_DAG	LIPID	613.48	13.42
MCDS	C34:2_DAG	LIPID	615.496	13.89
MCDS	C34:1_DAG	LIPID	617.511	14.37
MCDS	C36:3_DAG	LIPID	641.511	13.98
MCDS	C36:2_DAG	LIPID	643.527	14.5
MCDS	C36:1_DAG	LIPID	645.543	15.09
MCDS	C36:4_DAG	LIPID	639.496	13.51
MCDS	C14:0_CE	LIPID	619.542	18.28
MCDS	C16:1_CE	LIPID	645.558	18.36
MCDS	C16:0_CE	LIPID	647.574	18.84
MCDS	C18:3_CE	LIPID	669.558	18.05
MCDS	C18:2_CE	LIPID	671.573	18.45
MCDS	C18:1_CE	LIPID	673.588	19.03
MCDS	C18:0_CE	LIPID	675.604	19.58
MCDS	C20:5_CE	LIPID	693.557	17.8
MCDS	C20:4_CE	LIPID	695.573	18.2
MCDS	C20:3_CE	LIPID	697.589	18.66
MCDS	C22:6_CE	LIPID	719.573	17.98
MCDS	C42:0_TAG	LIPID	745.631	16.93
MCDS	C44:2_TAG	LIPID	769.63	16.65
MCDS	C44:1_TAG	LIPID	771.646	17.01
MCDS	C44:0_TAG	LIPID	773.662	17.42
MCDS	C46:4_TAG	LIPID	793.63	16.39
MCDS	C46:3_TAG	LIPID	795.647	16.78
MCDS	C46:2_TAG	LIPID	797.662	17.12
MCDS	C46:1_TAG	LIPID	799.677	17.5
MCDS	C46:0_TAG	LIPID	801.693	17.94
MCDS	C48:5_TAG	LIPID	819.646	16.56
MCDS	C48:4_TAG	LIPID	821.662	16.9
MCDS	C48:3_TAG	LIPID	823.677	17.25
MCDS	C48:2_TAG	LIPID	825.692	17.62
MCDS	C48:1_TAG	LIPID	827.708	18
MCDS	C48:0_TAG	LIPID	829.725	18.42
MCDS	C50:6_TAG	LIPID	845.662	16.78
MCDS	C50:5_TAG	LIPID	847.677	17.04
MCDS	C50:4_TAG	LIPID	849.693	17.36
MCDS	C50:3_TAG	LIPID	851.707	17.72
MCDS	C50:2_TAG	LIPID	853.724	18.09
MCDS	C50:1_TAG	LIPID	855.74	18.5
MCDS	C50:0_TAG	LIPID	857.755	18.95
MCDS	C52:7_TAG	LIPID	871.678	16.9
MCDS	C52:6_TAG	LIPID	873.693	17.21
MCDS	C52:5_TAG	LIPID	875.708	17.5
MCDS	C52:4_TAG	LIPID	877.722	17.86
MCDS	C52:3_TAG	LIPID	879.738	18.23
MCDS	C52:2_TAG	LIPID	881.755	18.62
MCDS	C52:1_TAG	LIPID	883.771	19.07
MCDS	C52:0_TAG	LIPID	885.786	21.32
MCDS	C54:9_TAG	LIPID	895.678	16.86
MCDS	C54:8_TAG	LIPID	897.693	17.03
MCDS	C54:7_TAG	LIPID	899.708	17.31
MCDS	C54:6_TAG	LIPID	901.723	17.62
MCDS	C54:5_TAG	LIPID	903.738	17.98
MCDS	C54:4_TAG	LIPID	905.755	18.33
MCDS	C54:3_TAG	LIPID	907.77	18.74
MCDS	C54:2_TAG	LIPID	909.787	19.15
MCDS	C54:1_TAG	LIPID	911.803	19.56
MCDS	C56:10_TAG	LIPID	921.694	16.96
MCDS	C56:9_TAG	LIPID	923.709	17.28
MCDS	C56:8_TAG	LIPID	925.723	17.62
MCDS	C56:7_TAG	LIPID	927.738	17.86
MCDS	C56:6_TAG	LIPID	929.756	18.26
MCDS	C56:5_TAG	LIPID	931.771	18.66
MCDS	C56:4_TAG	LIPID	933.786	18.79
MCDS	C56:3_TAG	LIPID	935.802	19.25
MCDS	C56:2_TAG	LIPID	937.818	19.68
MCDS	C56:1_TAG	LIPID	939.834	20.2
MCDS	C58:12_TAG	LIPID	945.695	16.8
MCDS	C58:11_TAG	LIPID	947.71	17.12
MCDS	C58:10_TAG	LIPID	949.724	17.42
MCDS	C58:9_TAG	LIPID	951.739	17.77
MCDS	C58:8_TAG	LIPID	953.755	18.04
MCDS	C58:7_TAG	LIPID	955.77	18.31
MCDS	C58:6_TAG	LIPID	957.787	18.71
MCDS	C60:12_TAG	LIPID	973.726	17.31
BioAge	C14:0_LPC_C8-pos	C8-pos	468.309	4.34
BioAge	C16:1_LPC_C8-pos	C8-pos	494.324	4.49
BioAge	C16:0_LPC	C8-pos	496.34	4.83
BioAge	C18:2_LPC_C8-pos	C8-pos	520.34	4.67
BioAge	C18:1_LPC_C8-pos	C8-pos	522.356	5.01
BioAge	C18:0_LPC_C8-pos	C8-pos	524.371	5.4
BioAge	C20:5_LPC	C8-pos	542.322	4.56
BioAge	C20:4_LPC_C8-pos	C8-pos	544.34	4.69
BioAge	C20:3_LPC	C8-pos	518.322	4.83
BioAge	C22:6_LPC_C8-pos	C8-pos	568.34	4.67
BioAge	C16:0_LPE_C8-pos	C8-pos	454.293	4.85
BioAge	C18:2_LPE_C8-pos	C8-pos	478.293	4.68
BioAge	C18:1_LPE_C8-pos	C8-pos	480.308	5.01
BioAge	C18:0_LPE	C8-pos	482.324	5.41
BioAge	C20:4_LPE_C8-pos	C8-pos	502.293	4.7
BioAge	C20:0_LPE	C8-pos	510.356	5.11
BioAge	C22:6_LPE_C8-pos	C8-pos	526.293	4.68
BioAge	C22:0_LPE	C8-pos	538.387	5.71
BioAge	C30:1_PC	C8-pos	704.522	7.78
BioAge	C30:0_PC	C8-pos	706.538	8.12
BioAge	C32:2_PC	C8-pos	730.538	7.93
BioAge	C32:1_PC	C8-pos	732.553	8.28
BioAge	C32:0_PC	C8-pos	734.569	8.59
BioAge	C34:4_PC	C8-pos	754.538	7.96
BioAge	C34:3_PC	C8-pos	756.553	8.13
BioAge	C34:2_PC	C8-pos	758.569	8.42
BioAge	C34:1_PC	C8-pos	760.585	8.74
BioAge	C34:0_PC	C8-pos	762.6	9.05
BioAge	C36:4_PC-A	C8-pos	782.569	8.25
BioAge	C36:4_PC-B	C8-pos	782.568	8.45
BioAge	C36:3_PC	C8-pos	784.585	8.6
BioAge	C36:2_PC	C8-pos	786.6	8.89
BioAge	C36:1_PC	C8-pos	788.616	9.18
BioAge	C36:0_PC	C8-pos	790.632	9.45
BioAge	C38:6_PC	C8-pos	806.569	8.38
BioAge	C38:4_PC	C8-pos	810.599	8.91
BioAge	C38:3_PC	C8-pos	812.616	9.05
BioAge	C38:2_PC	C8-pos	814.632	9.27
BioAge	C40:10_PC	C8-pos	826.535	8.05
BioAge	C40:9_PC	C8-pos	828.55	8.38
BioAge	C40:6_PC	C8-pos	834.599	8.84
BioAge	C34:5_PC_plasmalogen	C8-pos	738.543	8.97
BioAge	C34:4_PC_plasmalogen	C8-pos	740.556	8.64
BioAge	C34:3_PC_plasmalogen	C8-pos	742.574	8.73
BioAge	C34:2_PC_plasmalogen	C8-pos	744.59	9.03
BioAge	C34:1_PC_plasmalogen-A	C8-pos	746.605	9.03
BioAge	C34:1_PC_plasmalogen-B	C8-pos	746.605	9.34
BioAge	C36:5_PC_plasmalogen-A	C8-pos	766.573	8.49
BioAge	C36:5_PC_plasmalogen-B	C8-pos	766.573	8.73
BioAge	C36:4_PC_plasmalogen	C8-pos	768.587	9.03
BioAge	C36:3_PC_plasmalogen	C8-pos	770.605	9.17
BioAge	C36:2_PC_plasmalogen	C8-pos	772.62	9.19
BioAge	C36:1_PC_plasmalogen	C8-pos	774.634	9.47
BioAge	C38:7_PC_plasmalogen	C8-pos	790.574	8.66
BioAge	C38:6_PC_plasmalogen	C8-pos	792.588	8.85
BioAge	C38:4_PC_plasmalogen	C8-pos	796.622	9.22
BioAge	C40:7_PC_plasmalogen	C8-pos	818.604	9.11
BioAge	C32:0_PE	C8-pos	692.522	7.85
BioAge	C34:2_PE	C8-pos	716.521	8.42
BioAge	C34:0_PE	C8-pos	720.553	8.36
BioAge	C36:4_PE	C8-pos	740.523	8.45
BioAge	C36:3_PE	C8-pos	742.538	8.54
BioAge	C36:2_PE	C8-pos	744.554	8.88
BioAge	C36:1_PE	C8-pos	746.571	9.18
BioAge	C36:0_PE	C8-pos	748.585	8.78
BioAge	C38:6_PE	C8-pos	764.522	8.38
BioAge	C38:5_PE	C8-pos	766.539	8.65
BioAge	C38:4_PE	C8-pos	768.554	8.91
BioAge	C38:2_PE	C8-pos	772.584	8.66
BioAge	C40:6_PE	C8-pos	792.553	8.84
BioAge	C34:3_PE_plasmalogen	C8-pos	700.526	8.73
BioAge	C34:2_PE_plasmalogen	C8-pos	702.543	9.03
BioAge	C36:5_PE_plasmalogen	C8-pos	724.528	8.74
BioAge	C36:4_PE_plasmalogen	C8-pos	726.543	8.85
BioAge	C36:3_PE_plasmalogen	C8-pos	728.558	9.18
BioAge	C36:2_PE_plasmalogen	C8-pos	730.574	9.46
BioAge	C36:1_PE_plasmalogen	C8-pos	732.589	9.07
BioAge	C38:7_PE_plasmalogen	C8-pos	748.527	8.67
BioAge	C38:6_PE_plasmalogen	C8-pos	750.543	8.86
BioAge	C38:5_PE_plasmalogen	C8-pos	752.559	9.18
BioAge	C38:3_PE_plasmalogen	C8-pos	756.59	8.95
BioAge	C40:7_PE_plasmalogen	C8-pos	776.558	9.11
BioAge	C42:11_PE_plasmalogen	C8-pos	796.525	8.79
BioAge	C44:13_PE_plasmalogen	C8-pos	820.525	8.24
BioAge	C34:2_PI	C8-pos	835.533	8.2
BioAge	C34:0_PI	C8-pos	839.564	8.9
BioAge	C36:2_PI	C8-pos	863.564	8.67
BioAge	C38:4_PI	C8-pos	887.564	8.44
BioAge	C34:0_PS	C8-pos	764.547	8.16
BioAge	C38:6_PS	C8-pos	808.507	8.03
BioAge	C40:6_PS	C8-pos	836.538	8.52
BioAge	C36:3_PS_plasmalogen	C8-pos	772.548	7.84
BioAge	C36:2_PS_plasmalogen	C8-pos	774.564	7.8
BioAge	C36:1_PS_plasmalogen	C8-pos	776.579	8.14
BioAge	sphingosine_C8-pos	C8-pos	300.29	4.12
BioAge	C16:0_Ceramide_(d18:1)	C8-pos	538.519	8.29
BioAge	C22:0_Ceramide_(d18:1)	C8-pos	622.613	9.67
BioAge	C24:0_Ceramide_(d18:1)	C8-pos	650.644	10.09
BioAge	C24:1_Ceramide_(d18:1)	C8-pos	648.629	9.73
BioAge	C14:0_SM_C8-pos	C8-pos	675.543	7.64
BioAge	C16:1_SM	C8-pos	701.559	7.8
BioAge	C16:0_SM_C8-pos	C8-pos	703.575	8.15
BioAge	C18:2_SM_C8-pos	C8-pos	749.556	7.99
BioAge	C18:1_SM_C8-pos	C8-pos	729.59	8.33
BioAge	C18:0_SM_C8-pos	C8-pos	731.606	8.65
BioAge	C20:0_SM	C8-pos	759.637	9.17
BioAge	C22:1_SM	C8-pos	785.653	9.28
BioAge	C22:0_SM	C8-pos	787.668	9.57
BioAge	C24:1_SM	C8-pos	813.684	9.61
BioAge	C24:0_SM	C8-pos	815.7	9.99
BioAge	C14:0_CE	C8-pos	619.542	11.66
BioAge	C16:1_CE	C8-pos	645.558	11.75
BioAge	C16:0_CE	C8-pos	647.573	12.08
BioAge	C18:3_CE	C8-pos	669.558	11.59
BioAge	C18:2_CE	C8-pos	671.573	11.83
BioAge	C18:1_CE	C8-pos	673.589	12.15
BioAge	C18:0_CE	C8-pos	675.605	12.54
BioAge	C20:5_CE	C8-pos	693.558	11.43
BioAge	C20:4_CE	C8-pos	695.573	11.7
BioAge	C20:3_CE	C8-pos	697.589	11.97
BioAge	C22:6_CE	C8-pos	719.573	11.56
BioAge	C22:5_CE	C8-pos	721.589	11.78
BioAge	C22:4_CE	C8-pos	723.605	12.05
BioAge	C14:1_MAG	C8-pos	323.219	4.52
BioAge	C22:1_MAG	C8-pos	435.344	6.88
BioAge	C30:0_DAG	C8-pos	563.465	8.65
BioAge	C32:2_DAG	C8-pos	587.464	8.49
BioAge	C32:1_DAG	C8-pos	589.48	8.79
BioAge	C32:0_DAG	C8-pos	591.496	9.11
BioAge	C34:3_DAG	C8-pos	613.48	8.62
BioAge	C34:2_DAG	C8-pos	615.496	8.95
BioAge	C34:1_DAG	C8-pos	617.511	9.24
BioAge	C34:0_DAG	C8-pos	619.527	9.53
BioAge	C36:4_DAG	C8-pos	639.496	8.79
BioAge	C36:3_DAG	C8-pos	641.511	9.07
BioAge	C36:2_DAG	C8-pos	643.527	9.36
BioAge	C36:1_DAG	C8-pos	645.543	9.67
BioAge	C36:0_DAG	C8-pos	647.558	9.94
BioAge	C38:5_DAG	C8-pos	665.511	9.03
BioAge	C38:4_DAG	C8-pos	667.527	9.35
BioAge	C41:0_TAG	C8-pos	731.615	10.74
BioAge	C42:0_TAG	C8-pos	745.631	10.93
BioAge	C43:2_TAG	C8-pos	755.615	10.59
BioAge	C43:1_TAG	C8-pos	757.631	10.86
BioAge	C43:0_TAG	C8-pos	759.647	11.09
BioAge	C44:2_TAG	C8-pos	769.631	10.77
BioAge	C44:1_TAG	C8-pos	771.647	11.04
BioAge	C44:0_TAG	C8-pos	773.662	11.29
BioAge	C45:3_TAG	C8-pos	781.632	10.72
BioAge	C45:2_TAG	C8-pos	783.647	10.95
BioAge	C45:1_TAG	C8-pos	785.662	11.2
BioAge	C45:0_TAG	C8-pos	787.678	11.45
BioAge	C46:4_TAG	C8-pos	793.631	10.62
BioAge	C46:3_TAG	C8-pos	795.647	10.88
BioAge	C46:2_TAG	C8-pos	797.663	11.13
BioAge	C46:1_TAG	C8-pos	799.678	11.38
BioAge	C46:0_TAG	C8-pos	801.694	11.62
BioAge	C47:2_TAG	C8-pos	811.678	11.3
BioAge	C47:1_TAG	C8-pos	813.694	11.54
BioAge	C47:0_TAG	C8-pos	815.709	11.78
BioAge	C48:5_TAG	C8-pos	819.647	10.72
BioAge	C48:4_TAG	C8-pos	821.662	10.96
BioAge	C48:3_TAG	C8-pos	823.678	11.22
BioAge	C48:2_TAG	C8-pos	825.693	11.47
BioAge	C48:1_TAG	C8-pos	827.709	11.73
BioAge	C48:0_TAG	C8-pos	829.725	11.98
BioAge	C49:3_TAG	C8-pos	837.694	11.39
BioAge	C49:2_TAG	C8-pos	839.71	11.64
BioAge	C49:1_TAG	C8-pos	841.725	11.89
BioAge	C49:0_TAG	C8-pos	843.741	12.12
BioAge	C50:6_TAG	C8-pos	845.662	10.99
BioAge	C50:5_TAG	C8-pos	847.678	11.07
BioAge	C50:4_TAG	C8-pos	849.693	11.32
BioAge	C50:3_TAG	C8-pos	851.708	11.57
BioAge	C50:2_TAG	C8-pos	853.725	11.81
BioAge	C50:1_TAG	C8-pos	855.741	12.07
BioAge	C50:0_TAG	C8-pos	857.756	12.33
BioAge	C51:3_TAG	C8-pos	865.725	11.74
BioAge	C51:2_TAG	C8-pos	867.741	11.99
BioAge	C51:1_TAG	C8-pos	869.757	12.24
BioAge	C51:0_TAG	C8-pos	871.772	12.51
BioAge	C52:7_TAG	C8-pos	871.678	11.09
BioAge	C52:6_TAG	C8-pos	873.693	11.18
BioAge	C52:5_TAG	C8-pos	875.709	11.41
BioAge	C52:4_TAG	C8-pos	877.724	11.66
BioAge	C52:3_TAG	C8-pos	879.74	11.91
BioAge	C52:2_TAG	C8-pos	881.756	12.17
BioAge	C52:1_TAG	C8-pos	883.772	12.42
BioAge	C52:0_TAG	C8-pos	885.788	12.71
BioAge	C53:3_TAG	C8-pos	893.756	12.09
BioAge	C53:2_TAG	C8-pos	895.772	12.33
BioAge	C54:10_TAG	C8-pos	893.662	9.8
BioAge	C54:9_TAG	C8-pos	895.679	10.95
BioAge	C54:8_TAG	C8-pos	897.694	11.18
BioAge	C54:7_TAG	C8-pos	899.709	11.39
BioAge	C54:6_TAG	C8-pos	901.724	11.51
BioAge	C54:5_TAG	C8-pos	903.741	11.9
BioAge	C54:4_TAG	C8-pos	905.755	12.01
BioAge	C54:3_TAG	C8-pos	907.772	12.26
BioAge	C54:2_TAG	C8-pos	909.788	12.52
BioAge	C54:1_TAG	C8-pos	911.803	12.8
BioAge	C55:3_TAG	C8-pos	921.788	12.44
BioAge	C55:2_TAG	C8-pos	923.804	12.69
BioAge	C56:10_TAG	C8-pos	921.694	11.12
BioAge	C56:9_TAG	C8-pos	923.709	11.29
BioAge	C56:8_TAG	C8-pos	925.724	11.53
BioAge	C56:7_TAG	C8-pos	927.74	11.78
BioAge	C56:6_TAG	C8-pos	929.756	11.98
BioAge	C56:5_TAG	C8-pos	931.771	12.12
BioAge	C56:4_TAG	C8-pos	933.787	12.35
BioAge	C56:3_TAG	C8-pos	935.803	12.61
BioAge	C56:2_TAG	C8-pos	937.816	12.89
BioAge	C56:1_TAG	C8-pos	939.836	13.22
BioAge	C58:11_TAG	C8-pos	947.709	11.25
BioAge	C58:10_TAG	C8-pos	949.724	11.39
BioAge	C58:9_TAG	C8-pos	951.739	11.62
BioAge	C58:8_TAG	C8-pos	953.756	11.88
BioAge	C58:7_TAG	C8-pos	955.772	12.12
BioAge	C58:6_TAG	C8-pos	957.788	12.24
BioAge	C60:12_TAG	C8-pos	973.724	11.37
BioAge	C14:0_CE_+NH4	C8-pos	614.587	11.66
BioAge	C16:1_CE_+NH4	C8-pos	640.602	11.75
BioAge	C16:0_CE_+NH4	C8-pos	642.618	12.07
BioAge	C18:3_CE_+NH4	C8-pos	664.602	11.58
BioAge	C18:2_CE_+NH4	C8-pos	666.618	11.83
BioAge	C18:1_CE_+NH4	C8-pos	668.634	12.15
BioAge	C18:0_CE_+NH4	C8-pos	670.649	12.54
BioAge	C20:5_CE_+NH4	C8-pos	688.602	11.43
BioAge	C20:4_CE_+NH4	C8-pos	690.618	11.7
BioAge	C20:3_CE_+NH4	C8-pos	692.634	11.98
BioAge	C22:6_CE_+NH4	C8-pos	714.618	11.56
BioAge	C22:5_CE_+NH4	C8-pos	716.633	11.78
BioAge	C22:4_CE_+NH4	C8-pos	718.649	12.07
BioAge	C22:1_MAG_+NH4	C8-pos	430.389	6.89
BioAge	C30:0_DAG_+NH4	C8-pos	558.509	8.66
BioAge	C32:1_DAG_+NH4	C8-pos	584.525	8.79
BioAge	C32:0_DAG_+NH4	C8-pos	586.541	9.12
BioAge	C34:3_DAG_+NH4	C8-pos	608.525	8.62
BioAge	C34:2_DAG_+NH4	C8-pos	610.54	8.94
BioAge	C34:1_DAG_+NH4	C8-pos	612.556	9.24
BioAge	C34:0_DAG_+NH4	C8-pos	614.572	9.56
BioAge	C36:4_DAG_+NH4	C8-pos	634.54	8.77
BioAge	C36:3_DAG_+NH4	C8-pos	636.556	9.07
BioAge	C36:2_DAG_+NH4	C8-pos	638.572	9.36
BioAge	C36:1_DAG_+NH4	C8-pos	640.587	9.67
BioAge	C36:0_DAG_+NH4	C8-pos	642.602	9.94
BioAge	C38:5_DAG_+NH4	C8-pos	660.556	9.05
BioAge	C38:4_DAG_+NH4	C8-pos	662.571	9.34
BioAge	C41:0_TAG_+NH4	C8-pos	726.66	10.75
BioAge	C42:0_TAG_+NH4	C8-pos	740.676	10.93
BioAge	C43:2_TAG_+NH4	C8-pos	750.66	10.58
BioAge	C43:1_TAG_+NH4	C8-pos	752.676	10.86
BioAge	C43:0_TAG_+NH4	C8-pos	754.691	11.09
BioAge	C44:2_TAG_+NH4	C8-pos	764.676	10.77
BioAge	C44:1_TAG_+NH4	C8-pos	766.692	11.03
BioAge	C44:0_TAG_+NH4	C8-pos	768.707	11.29
BioAge	C45:2_TAG_+NH4	C8-pos	778.692	10.96
BioAge	C45:1_TAG_+NH4	C8-pos	780.707	11.21
BioAge	C45:0_TAG_+NH4	C8-pos	782.722	11.45
BioAge	C46:4_TAG_+NH4	C8-pos	788.676	10.62
BioAge	C46:3_TAG_+NH4	C8-pos	790.692	10.88
BioAge	C46:2_TAG_+NH4	C8-pos	792.707	11.12
BioAge	C46:1_TAG_+NH4	C8-pos	794.723	11.39
BioAge	C46:0_TAG_+NH4	C8-pos	796.738	11.62
BioAge	C47:2_TAG_+NH4	C8-pos	806.723	11.3
BioAge	C47:1_TAG_+NH4	C8-pos	808.739	11.55
BioAge	C47:0_TAG_+NH4	C8-pos	810.754	11.78
BioAge	C48:5_TAG_+NH4	C8-pos	814.691	10.71
BioAge	C48:4_TAG_+NH4	C8-pos	816.707	10.97
BioAge	C48:3_TAG_+NH4	C8-pos	818.723	11.22
BioAge	C48:2_TAG_+NH4	C8-pos	820.738	11.47
BioAge	C48:1_TAG_+NH4	C8-pos	822.754	11.73
BioAge	C48:0_TAG_+NH4	C8-pos	824.769	11.98
BioAge	C49:3_TAG_+NH4	C8-pos	832.738	11.39
BioAge	C49:2_TAG_+NH4	C8-pos	834.754	11.64
BioAge	C49:1_TAG_+NH4	C8-pos	836.77	11.89
BioAge	C49:0_TAG_+NH4	C8-pos	838.787	12.14
BioAge	C50:6_TAG_+NH4	C8-pos	840.708	10.94
BioAge	C50:5_TAG_+NH4	C8-pos	842.723	11.07
BioAge	C50:4_TAG_+NH4	C8-pos	844.738	11.32
BioAge	C50:3_TAG_+NH4	C8-pos	846.754	11.57
BioAge	C50:2_TAG_+NH4	C8-pos	848.77	11.82
BioAge	C50:1_TAG_+NH4	C8-pos	850.786	12.07
BioAge	C50:0_TAG_+NH4	C8-pos	852.801	12.33
BioAge	C51:3_TAG_+NH4	C8-pos	860.769	11.74
BioAge	C51:2_TAG_+NH4	C8-pos	862.785	11.99
BioAge	C51:1_TAG_+NH4	C8-pos	864.801	12.24
BioAge	C51:0_TAG_+NH4	C8-pos	866.815	12.51
BioAge	C52:7_TAG_+NH4	C8-pos	866.724	11.09
BioAge	C52:6_TAG_+NH4	C8-pos	868.739	11.3
BioAge	C52:4_TAG_+NH4	C8-pos	872.769	11.66
BioAge	C52:3_TAG_+NH4	C8-pos	874.785	11.91
BioAge	C52:2_TAG_+NH4	C8-pos	876.801	12.17
BioAge	C52:1_TAG_+NH4	C8-pos	878.817	12.42
BioAge	C52:0_TAG_+NH4	C8-pos	880.832	12.7
BioAge	C53:3_TAG_+NH4	C8-pos	888.802	12.08
BioAge	C53:2_TAG_+NH4	C8-pos	890.817	12.33
BioAge	C54:9_TAG_+NH4	C8-pos	890.725	10.95
BioAge	C54:8_TAG_+NH4	C8-pos	892.739	11.16
BioAge	C54:7_TAG_+NH4	C8-pos	894.754	11.43
BioAge	C54:4_TAG_+NH4	C8-pos	900.802	12.01
BioAge	C54:3_TAG_+NH4	C8-pos	902.817	12.26
BioAge	C54:2_TAG_+NH4	C8-pos	904.833	12.52
BioAge	C54:1_TAG_+NH4	C8-pos	906.848	12.8
BioAge	C55:3_TAG_+NH4	C8-pos	916.832	12.43
BioAge	C55:2_TAG_+NH4	C8-pos	918.848	12.69
BioAge	C56:10_TAG_+NH4	C8-pos	916.739	11.12
BioAge	C56:9_TAG_+NH4	C8-pos	918.755	11.29
BioAge	C56:8_TAG_+NH4	C8-pos	920.769	11.53
BioAge	C56:7_TAG_+NH4	C8-pos	922.785	11.78
BioAge	C56:6_TAG_+NH4	C8-pos	924.801	11.98
BioAge	C56:5_TAG_+NH4	C8-pos	926.816	12.22
BioAge	C56:4_TAG_+NH4	C8-pos	928.832	12.35
BioAge	C56:3_TAG_+NH4	C8-pos	930.848	12.6
BioAge	C56:2_TAG_+NH4	C8-pos	932.864	12.88
BioAge	C56:1_TAG_+NH4	C8-pos	934.879	13.22
BioAge	C58:11_TAG_+NH4	C8-pos	942.755	11.25
BioAge	C58:10_TAG_+NH4	C8-pos	944.769	11.39
BioAge	C58:9_TAG_+NH4	C8-pos	946.784	11.62
BioAge	C58:8_TAG_+NH4	C8-pos	948.801	11.88
BioAge	C58:7_TAG_+NH4	C8-pos	950.816	12.12
BioAge	C58:6_TAG_+NH4	C8-pos	952.832	12.24
BioAge	C60:12_TAG_+NH4	C8-pos	968.769	11.38
BioAge	Myristic_acid	C18-neg	227.201	13.76
BioAge	Myristoleic_acid	C18-neg	225.185	12.68
BioAge	Palmitic_acid	C18-neg	255.233	14.95
BioAge	Palmitoleic_acid	C18-neg	253.217	13.97
BioAge	Stearic_acid	C18-neg	283.264	15.92
BioAge	Oleic_acid	C18-neg	281.248	15.08
BioAge	Linoleic_acid	C18-neg	279.233	14.26
BioAge	Gamma-Linolenic_acid	C18-neg	277.217	13.5
BioAge	8.11.14-Eicosatrienoic_acid	C18-neg	305.248	14.57
BioAge	Arachidonic_acid	C18-neg	303.233	14.08
BioAge	Eicosapentaenoic_acid	C18-neg	301.217	13.37
BioAge	Adrenic_acid	C18-neg	331.264	14.86
BioAge	Docosapentaenoic_acid	C18-neg	329.248	14.22
BioAge	Docosahexaenoic_acid	C18-neg	327.233	13.86
BioAge	Sphingosine_1-Phosphate	C18-neg	378.241	10.36
BioAge	Lithocholate	C18-neg	375.289	12.08
BioAge	Cholate	C18-neg	407.28	8.81
BioAge	Deoxycholate	C18-neg	391.285	10.43
BioAge	Chenodeoxycholate	C18-neg	391.285	10.21
BioAge	Glycocholate	C18-neg	464.301	7.81
BioAge	Glycodeoxycholate	C18-neg	448.307	9.15
BioAge	Glycochenodeoxycholate	C18-neg	448.307	8.91
BioAge	Glycoursodeoxycholate	C18-neg	448.307	7.77
BioAge	Glycolithocholate	C18-neg	432.311	10.54
BioAge	Taurodeoxycholate	C18-neg	498.288	8.25
BioAge	Taurochenodeoxycholate	C18-neg	498.288	7.98
BioAge	Taurohyodeoxycholate/Tauroursodeoxycholate	C18-neg	498.288	7.01
BioAge	Taurolithocholate	C18-neg	482.293	9.15
BioAge	Beta-muricholate	C18-neg	407.279	7.45
BioAge	Tauro-Alpha-muricholate/Tauro-Beta-muricholate	C18-neg	514.284	6.16
BioAge	Hydrochlorothiazide	C18-neg	295.957	1.36
BioAge	Salicyluric_acid	C18-neg	194.045	2.07
BioAge	Phenyllactic_acid	C18-neg	165.054	2.36
BioAge	Salicylic_acid	C18-neg	137.023	3.1
BioAge	Azelaic_acid	C18-neg	187.096	4.01
BioAge	Hydrocinnamic_acid	C18-neg	149.06	6.06
BioAge	2-Hydroxycaprylic_acid	C18-neg	159.101	6.56
BioAge	Dodecanedioic_acid	C18-neg	229.144	7.74
BioAge	Pregnenolone_sulfate	C18-neg	395.189	8.52
BioAge	Caprylic_acid	C18-neg	143.107	8.75
BioAge	Tetradecanedioic_acid	C18-neg	257.175	9.15
BioAge	Hexadecanedioic_acid	C18-neg	285.207	10.48
BioAge	Dodecanoic_acid	C18-neg	199.169	12.32
BioAge	Eicosadienoic_acid	C18-neg	307.264	15.23
BioAge	17-Methylstearate	C18-neg	297.28	16.22
BioAge	Erucic_acid	C18-neg	337.311	16.81
BioAge	Capric_acid	C18-neg	171.138	10.67
BioAge	glycine	HILIC-pos	76.0398	8
BioAge	alanine	HILIC-pos	90.0556	7.87
BioAge	serine	HILIC-pos	106.05	7.75
BioAge	threonine	HILIC-pos	120.066	7.71
BioAge	methionine	HILIC-pos	150.058	7.11
BioAge	aspartate	HILIC-pos	134.045	8.2
BioAge	glutamate_HILIC-pos	HILIC-pos	148.06	7.69
BioAge	asparagine	HILIC-pos	133.061	8.02
BioAge	glutamine	HILIC-pos	147.076	8.11
BioAge	histidine	HILIC-pos	156.077	9.42
BioAge	arginine	HILIC-pos	175.119	9.22
BioAge	lysine	HILIC-pos	147.113	9.44
BioAge	valine	HILIC-pos	118.087	7.47
BioAge	leucine	HILIC-pos	132.102	7.03
BioAge	isoleucine	HILIC-pos	132.102	7.15
BioAge	phenylalanine	HILIC-pos	166.086	6.77
BioAge	tyrosine	HILIC-pos	182.081	6.87
BioAge	tryptophan_HILIC-pos	HILIC-pos	205.097	6.55
BioAge	proline	HILIC-pos	116.071	8.18
BioAge	hydroxyproline	HILIC-pos	132.066	7.97
BioAge	ornithine	HILIC-pos	133.097	9.33
BioAge	citrulline	HILIC-pos	176.103	8.43
BioAge	taurine_HILIC-pos	HILIC-pos	126.022	6.16
BioAge	serotonin	HILIC-pos	177.102	6.31
BioAge	GABA	HILIC-pos	104.071	7.59
BioAge	acetylglycine	HILIC-pos	118.05	4.67
BioAge	dimethylglycine	HILIC-pos	104.071	8.63
BioAge	ADMA	HILIC-pos	203.15	9.81
BioAge	SDMA	HILIC-pos	203.15	9.71
BioAge	NMMA	HILIC-pos	189.135	9.42
BioAge	allantoin	HILIC-pos	159.051	3.65
BioAge	aminoisobutyric_acid	HILIC-pos	104.071	7.8
BioAge	anthranilic_acid	HILIC-pos	138.055	1.81
BioAge	kynurenic_acid	HILIC-pos	190.05	5.27
BioAge	1-methylhistamine	HILIC-pos	126.103	9.63
BioAge	3-hydroxyanthranilic_acid	HILIC-pos	154.05	1.83
BioAge	N-carbamoyl-beta-alanine	HILIC-pos	133.061	4.15
BioAge	thiamine	HILIC-pos	265.112	9.74
BioAge	niacinamide	HILIC-pos	123.056	3.84
BioAge	betaine	HILIC-pos	118.087	9.07
BioAge	choline	HILIC-pos	104.107	8.33
BioAge	phosphocholine	HILIC-pos	184.073	11.91
BioAge	phosphoethanolamine	HILIC-pos	142.026	9.2
BioAge	alpha-glycerophosphocholine	HILIC-pos	258.11	10.57
BioAge	acetylcholine	HILIC-pos	146.118	7.8
BioAge	spermidine	HILIC-pos	146.165	11.98
BioAge	creatine	HILIC-pos	132.077	8.38
BioAge	creatinine	HILIC-pos	114.067	6.55
BioAge	thyroxine	HILIC-pos	777.694	5.68
BioAge	trimethylamine-N-oxide	HILIC-pos	76.0763	8.14
BioAge	adenosine	HILIC-pos	268.104	5.07
BioAge	cytosine	HILIC-pos	112.051	6.25
BioAge	cotinine	HILIC-pos	177.102	5.13
BioAge	pipecolic_acid	HILIC-pos	130.086	8.05
BioAge	5-aminolevulinic_acid	HILIC-pos	132.066	7.53
BioAge	pyroglutamic_acid	HILIC-pos	130.05	8.11
BioAge	1-methylnicotinamide	HILIC-pos	137.071	8.28
BioAge	butyrobetaine	HILIC-pos	146.118	8.83
BioAge	putrescine	HILIC-pos	89.1079	9.39
BioAge	methionine_sulfoxide	HILIC-pos	166.053	8.72
BioAge	sarcosine	HILIC-pos	90.0555	8.2
BioAge	beta-alanine	HILIC-pos	90.0555	8.04
BioAge	anserine	HILIC-pos	241.129	10.61
BioAge	carnitine	HILIC-pos	162.113	8.88
BioAge	C2_carnitine	HILIC-pos	204.123	8.72
BioAge	C3_carnitine	HILIC-pos	218.139	8.36
BioAge	C3-DC-CH3_carnitine	HILIC-pos	262.129	8.62
BioAge	C4_carnitine	HILIC-pos	232.154	8.04
BioAge	C4-OH_carnitine	HILIC-pos	248.149	8.9
BioAge	C5_carnitine	HILIC-pos	246.17	7.8
BioAge	C5:1_carnitine	HILIC-pos	244.154	7.89
BioAge	C5-DC_carnitine	HILIC-pos	276.144	8.37
BioAge	C6_carnitine	HILIC-pos	260.186	7.58
BioAge	C7_carnitine	HILIC-pos	274.201	7.47
BioAge	C8_carnitine	HILIC-pos	288.217	7.37
BioAge	C9_carnitine	HILIC-pos	302.233	7.23
BioAge	C10_carnitine	HILIC-pos	316.248	7.14
BioAge	C10:2_carnitine	HILIC-pos	312.217	7.27
BioAge	C12_carnitine	HILIC-pos	344.279	6.94
BioAge	C12:1_carnitine	HILIC-pos	342.264	6.97
BioAge	C14_carnitine	HILIC-pos	372.311	6.8
BioAge	C14:1_carnitine	HILIC-pos	370.295	6.8
BioAge	C14:2_carnitine	HILIC-pos	368.279	6.86
BioAge	C16_carnitine	HILIC-pos	400.342	6.68
BioAge	C16-OH_carnitine	HILIC-pos	416.337	7.13
BioAge	C18_carnitine	HILIC-pos	428.373	6.56
BioAge	C18:1_carnitine	HILIC-pos	426.358	6.59
BioAge	C18:2_carnitine	HILIC-pos	424.342	6.65
BioAge	C20_carnitine	HILIC-pos	456.405	6.46
BioAge	C26_carnitine	HILIC-pos	540.499	6.25
BioAge	guanidinoacetic_acid	HILIC-pos	118.061	7.92
BioAge	bilirubin	HILIC-pos	585.27	1.67
BioAge	C14:0_LPC_HILIC-pos	HILIC-pos	468.308	7.91
BioAge	C16:1_LPC_HILIC-pos	HILIC-pos	494.324	7.83
BioAge	C18:2_LPC_HILIC-pos	HILIC-pos	520.34	7.76
BioAge	C18:2_LPC_isomer	HILIC-pos	520.34	8.47
BioAge	C18:1_LPC_HILIC-pos	HILIC-pos	522.355	7.71
BioAge	C18:1_LPC_isomer	HILIC-pos	522.356	8.25
BioAge	C18:0_LPC_HILIC-pos	HILIC-pos	524.371	7.66
BioAge	C18:0_LPC_isomer	HILIC-pos	524.371	8.25
BioAge	C20:4_LPC_HILIC-pos	HILIC-pos	544.339	7.69
BioAge	C22:6_LPC_HILIC-pos	HILIC-pos	568.34	7.6
BioAge	C16:1_LPC_plasmalogen	HILIC-pos	480.345	7.6
BioAge	C18:1_LPC_plasmalogen	HILIC-pos	508.376	7.81
BioAge	C18:1_LPC_plasmalogen_isomer	HILIC-pos	508.376	7.49
BioAge	C16:0_LPE_HILIC-pos	HILIC-pos	454.293	6.32
BioAge	C18:2_LPE_HILIC-pos	HILIC-pos	478.293	6.3
BioAge	C18:1_LPE_HILIC-pos	HILIC-pos	480.308	6.27
BioAge	C20:4_LPE_HILIC-pos	HILIC-pos	502.293	6.25
BioAge	C22:6_LPE_HILIC-pos	HILIC-pos	526.293	6.23
BioAge	C14:0_SM_HILIC-pos	HILIC-pos	675.543	7.26
BioAge	C16:0_SM_HILIC-pos	HILIC-pos	703.574	7.2
BioAge	C18:2_SM_HILIC-pos	HILIC-pos	727.574	7.13
BioAge	C18:1_SM_HILIC-pos	HILIC-pos	729.59	7.13
BioAge	C18:0_SM_HILIC-pos	HILIC-pos	731.606	7.12
BioAge	inosine_HILIC-pos	HILIC-pos	269.088	4.95
BioAge	hypoxanthine_HILIC-pos	HILIC-pos	137.046	4.91
BioAge	1-Methyladenosine	HILIC-pos	282.12	7.74
BioAge	1-Methylhistidine	HILIC-pos	170.093	9.89
BioAge	2-O-methylguanosine	HILIC-pos	298.115	5.14
BioAge	21-Deoxycortisol	HILIC-pos	347.222	2
BioAge	4-Guanidinobutanoic_acid	HILIC-pos	146.092	7.39
BioAge	5-Methylcytosine	HILIC-pos	126.066	6.37
BioAge	6-8-Dihydroxypurine	HILIC-pos	153.041	4.44
BioAge	Acetaminophen	HILIC-pos	152.071	2
BioAge	Cortexolone	HILIC-pos	347.222	2
BioAge	Cortisol	HILIC-pos	363.217	1.81
BioAge	Cortisone	HILIC-pos	361.201	2
BioAge	2-Aminooctanoic_acid	HILIC-pos	160.133	6.47
BioAge	DMGV	HILIC-pos	202.119	7.87
BioAge	Dihydrothymine	HILIC-pos	129.066	2.57
BioAge	Ectoine	HILIC-pos	143.082	9
BioAge	Indoleacetic_acid	HILIC-pos	176.071	1.81
BioAge	Linoleoyl_ethanolamide	HILIC-pos	324.29	2
BioAge	N-Acetylphenylalanine	HILIC-pos	208.097	3.14
BioAge	N-Acetylleucine	HILIC-pos	174.113	2.81
BioAge	N-Acetylornithine	HILIC-pos	175.108	8.49
BioAge	N-Acetylputrescine	HILIC-pos	131.118	7.96
BioAge	N-Acetylarginine	HILIC-pos	217.129	8.22
BioAge	N-acetyltryptophan	HILIC-pos	247.108	2.84
BioAge	N6-Acetyllysine	HILIC-pos	189.123	8.44
BioAge	O-methylserine	HILIC-pos	120.066	7.71
BioAge	Proline_betaine	HILIC-pos	144.102	9.31
BioAge	Pseudouridine	HILIC-pos	245.077	4.28
BioAge	Pterin	HILIC-pos	164.057	4.83
BioAge	Pyrrolidonecarboxylic_acid	HILIC-pos	130.05	6.79
BioAge	Ribothymidine	HILIC-pos	259.092	3.09
BioAge	Sphinganine	HILIC-pos	302.305	5.82
BioAge	Urocanic_acid	HILIC-pos	139.05	4.57
BioAge	alpha-Aminoisobutyric_acid	HILIC-pos	104.071	7.71
BioAge	guanine	HILIC-pos	152.057	5.33
BioAge	guanosine	HILIC-pos	284.099	5.33
BioAge	myristoleic_acid	HILIC-pos	227.201	1.77
BioAge	sphingosine_HILIC-pos	HILIC-pos	300.29	2
BioAge	urate_HILIC-pos	HILIC-pos	169.036	4.34
BioAge	xanthine	HILIC-pos	153.041	3.83
BioAge	2-aminoadipate	HILIC-neg	160.061	5.25
BioAge	2-hydroxy-3-methylpentanoic_acid	HILIC-neg	131.071	3.4
BioAge	2-hydroxyglutarate	HILIC-neg	147.03	7
BioAge	2-phosphoglycerate	HILIC-neg	184.986	9.05
BioAge	3-methyladipate/pimelate	HILIC-neg	159.066	6.75
BioAge	3-methylxanthine	HILIC-neg	165.042	3.15
BioAge	3-phosphoglycerate	HILIC-neg	184.986	9.25
BioAge	4-pyridoxate	HILIC-neg	182.046	3.65
BioAge	5-methyluridine/ribothymidine	HILIC-neg	257.078	1.55
BioAge	N-acetyl-L-alanine	HILIC-neg	130.051	3.9
BioAge	aconitate	HILIC-neg	173.009	9.1
BioAge	adipate	HILIC-neg	145.051	6.8
BioAge	ADP	HILIC-neg	426.022	9.75
BioAge	alpha-glycerophosphate	HILIC-neg	171.006	7.25
BioAge	alpha-hydroxybutyrate/beta-hydroxybutyrate	HILIC-neg	103.04	3.6
BioAge	alpha-keto-beta-methylvalerate/alpha-ketoisocaproate	HILIC-neg	129.056	3.4
BioAge	alpha-ketoglutarate	HILIC-neg	145.014	7.35
BioAge	alpha-ketoisovalerate	HILIC-neg	115.04	3.4
BioAge	AMP	HILIC-neg	346.056	7.65
BioAge	ascorbate	HILIC-neg	175.025	8.5
BioAge	azelaic_acid	HILIC-neg	187.098	6.95
BioAge	caprylic_acid	HILIC-neg	143.108	3.4
BioAge	chenodeoxycholate/deoxycholate	HILIC-neg	391.285	4
BioAge	citrate/isocitrate	HILIC-neg	191.02	9
BioAge	DHAP/glyceraldehyde_3P	HILIC-neg	168.991	8.65
BioAge	eicosapentaenoic_acid	HILIC-neg	301.217	3.1
BioAge	erythronic_acid	HILIC-neg	135.03	4.4
BioAge	fructose/glucose/galactose	HILIC-neg	179.056	1.85
BioAge	fucose	HILIC-neg	163.061	1.4
BioAge	fumarate/maleate	HILIC-neg	115.004	7.05
BioAge	GDP	HILIC-neg	442.017	10.55
BioAge	gentisate	HILIC-neg	153.019	4.6
BioAge	glucuronate	HILIC-neg	193.035	5
BioAge	glutamate_HILIC-neg	HILIC-neg	146.046	5.2
BioAge	glyceric_acid	HILIC-neg	105.019	4.1
BioAge	glycocholate	HILIC-neg	464.302	3.9
BioAge	glycodeoxycholate/glycochenodeoxycholate	HILIC-neg	448.307	3.8
BioAge	hexose_monophosphate	HILIC-neg	259.022	7.3
BioAge	hippurate	HILIC-neg	178.051	3.9
BioAge	homovanillate	HILIC-neg	181.051	4.4
BioAge	hydrocinnamic_acid	HILIC-neg	149.061	3.6
BioAge	hypoxanthine_HILIC-neg	HILIC-neg	135.031	3.4
BioAge	IMP	HILIC-neg	347.04	8.7
BioAge	indole-3-propionate	HILIC-neg	188.072	4.45
BioAge	indolelactate	HILIC-neg	204.067	4.4
BioAge	indoxylsulfate	HILIC-neg	212.002	3.8
BioAge	inosine_HILIC-neg	HILIC-neg	267.074	3.35
BioAge	inositol	HILIC-neg	179.056	2.7
BioAge	isovaleric_acid	HILIC-neg	101.061	3.55
BioAge	kynurenine	HILIC-neg	207.077	3.15
BioAge	lactate	HILIC-neg	89.0244	3.85
BioAge	lactose/sucrose/trehalose	HILIC-neg	341.109	2.45
BioAge	malate	HILIC-neg	133.014	6.95
BioAge	malonate	HILIC-neg	103.004	5
BioAge	methylcysteine	HILIC-neg	134.028	3.45
BioAge	N6-acetyl-L-lysine	HILIC-neg	187.109	3.1
BioAge	oxalate	HILIC-neg	88.988	7.4
BioAge	pantothenate	HILIC-neg	218.103	3.9
BioAge	pentose_monophosphate	HILIC-neg	229.012	7.25
BioAge	PEP	HILIC-neg	166.975	9.5
BioAge	phenyllactic_acid	HILIC-neg	165.056	3.55
BioAge	propionate	HILIC-neg	73.0295	3.9
BioAge	pyruvate	HILIC-neg	87.0088	4.8
BioAge	quinic_acid	HILIC-neg	191.056	4.3
BioAge	quinolinate	HILIC-neg	166.015	7.45
BioAge	salicylurate	HILIC-neg	194.046	6.1
BioAge	sebacate	HILIC-neg	201.113	6.75
BioAge	sorbitol	HILIC-neg	181.072	2
BioAge	suberate	HILIC-neg	173.082	6.75
BioAge	succinate	HILIC-neg	117.019	6.9
BioAge	taurine_HILIC-neg	HILIC-neg	124.007	3.6
BioAge	taurodeoxycholate/taurochenodeoxycholate	HILIC-neg	498.289	3.4
BioAge	thymine	HILIC-neg	125.036	1.35
BioAge	tryptophan_HILIC-neg	HILIC-neg	203.083	3.35
BioAge	uracil	HILIC-neg	111.02	1.5
BioAge	urate_HILIC-neg	HILIC-neg	167.021	5.25
BioAge	uridine	HILIC-neg	243.062	1.75
