# Supplementary material for: PAIRUP-MS: Pathway analysis and imputation to relate unknowns in profiles from mass spectrometry-based metabolite data
Source: PLoS Comput Biol. 2019 Jan 14;15(1):e1006734. doi: 10.1371/journal.pcbi.1006734 (PMC6347288; doi:10.1371/journal.pcbi.1006734)
Supplement: S2 Table — (a) Optimal parameter settings and corresponding calibration statistics for matching each pair of datasets. (b) Optimal parameter settings and corresponding calibration statistics for cross-method matching. (PDF) [file pcbi.1006734.s013.pdf]

**S2 Table. (a) Optimal parameter settings and corresponding calibration statistics for matching each pair of datasets.**

| Matched datasets | Matching method | Parameter settings |                       |                    |               |            | # of matched signals  | Shared known matching calibration statistics |           |               |           |               |                             |
|------------------|-----------------|--------------------|-----------------------|--------------------|---------------|------------|-----------------------|----------------------------------------------|-----------|---------------|-----------|---------------|-----------------------------|
|                  |                 | Adduct ion         | Correlation           | Correlation cutoff | Partition     | Match type |                       | # of matches                                 | # correct | # $r^2 > 0.8$ | % correct | % $r^2 > 0.8$ | % $r^2 > 0.8$ for incorrect |
| OE-MCDS          | IMP             | Adduct             | All correlation       | None               | Within method | Multiple   | 4432 <sup>a,c</sup>   | 166                                          | 97        | 151           | 58.4      | 91.0          | 78.3                        |
|                  |                 |                    |                       |                    |               | Reciprocal | 1573 <sup>a,b,c</sup> | 83                                           | 58        | 76            | 69.9      | 91.6          | 72.0                        |
|                  | RT              | Combined           | N/A                   | N/A                | Within method | Multiple   | 4432                  | 166                                          | 94        | 151           | 56.6      | 91.0          | 79.2                        |
|                  |                 |                    |                       |                    |               | Reciprocal | 1983                  | 152                                          | 81        | 138           | 53.3      | 90.8          | 80.3                        |
| OE-BioAge        | IMP             | Combined           | Dataset 1 correlation | None               | Within method | Multiple   | 7654 <sup>d,e</sup>   | 252                                          | 216       | 237           | 85.7      | 94.0          | 58.3                        |
|                  |                 |                    |                       |                    |               | Reciprocal | 3879                  | 241                                          | 211       | 231           | 87.6      | 95.9          | 66.7                        |
|                  | RT              | Combined           | N/A                   | N/A                | Within method | Multiple   | 7654                  | 252                                          | 215       | 224           | 85.3      | 88.9          | 24.3                        |
|                  |                 |                    |                       |                    |               | Reciprocal | 3824                  | 234                                          | 206       | 213           | 88.0      | 91.0          | 25.0                        |
| MCDS-BioAge      | IMP             | Combined           | All correlation       | None               | Within method | Multiple   | 4818 <sup>e</sup>     | 178                                          | 155       | 171           | 87.1      | 96.1          | 69.6                        |
|                  |                 |                    |                       |                    |               | Reciprocal | 2954                  | 169                                          | 148       | 163           | 87.6      | 96.4          | 71.4                        |
|                  | RT              | Combined           | N/A                   | N/A                | Within method | Multiple   | 4818                  | 178                                          | 163       | 168           | 91.6      | 94.4          | 33.3                        |
|                  |                 |                    |                       |                    |               | Reciprocal | 3025                  | 173                                          | 159       | 163           | 91.9      | 94.2          | 28.6                        |

**S2 Table. (b) Optimal parameter settings and corresponding calibration statistics for cross-method matching.**

| Matched datasets | Matching method | Parameter settings |                       |                    |               |            | # of matched signals | Shared known matching calibration statistics |           |               |           |               |                             |
|------------------|-----------------|--------------------|-----------------------|--------------------|---------------|------------|----------------------|----------------------------------------------|-----------|---------------|-----------|---------------|-----------------------------|
|                  |                 | Adduct ion         | Correlation           | Correlation cutoff | Partition     | Match type |                      | # of matches                                 | # correct | # $r^2 > 0.8$ | % correct | % $r^2 > 0.8$ | % $r^2 > 0.8$ for incorrect |
| OE-MCDS          | IMP             | Adduct             | All correlation       | None               | Across method | Multiple   | 7911                 | 170                                          | 94        | 155           | 58.9      | 88.4          | 71.8                        |
|                  |                 |                    |                       |                    |               | Reciprocal | 1875                 | 76                                           | 54        | 69            | 71.1      | 90.8          | 68.2                        |
|                  | RT              | Combined           | N/A                   | N/A                | Across method | Multiple   | 7911                 | 170                                          | 75        | 142           | 44.1      | 83.5          | 70.5                        |
|                  |                 |                    |                       |                    |               | Reciprocal | 2385                 | 135                                          | 55        | 115           | 40.7      | 85.2          | 75.0                        |
| OE-BioAge        | IMP             | Combined           | Dataset 1 correlation | None               | Across method | Multiple   | 9579                 | 252                                          | 201       | 235           | 79.8      | 93.3          | 66.7                        |
|                  |                 |                    |                       |                    |               | Reciprocal | 4041                 | 240                                          | 195       | 228           | 81.3      | 95.0          | 73.3                        |
|                  | RT              | Combined           | N/A                   | N/A                | Across method | Multiple   | 9579                 | 252                                          | 200       | 210           | 79.4      | 83.3          | 19.2                        |
|                  |                 |                    |                       |                    |               | Reciprocal | 3994                 | 223                                          | 187       | 194           | 83.9      | 87.0          | 19.4                        |
| MCDS-BioAge      | IMP             | Combined           | All correlation       | None               | Across method | Multiple   | 5251                 | 178                                          | 148       | 170           | 83.1      | 95.5          | 73.3                        |
|                  |                 |                    |                       |                    |               | Reciprocal | 3004                 | 158                                          | 137       | 151           | 86.7      | 95.6          | 66.7                        |
|                  | RT              | Combined           | N/A                   | N/A                | Across method | Multiple   | 5251                 | 178                                          | 141       | 146           | 79.2      | 82.0          | 13.5                        |
|                  |                 |                    |                       |                    |               | Reciprocal | 3042                 | 149                                          | 122       | 123           | 81.9      | 82.6          | 3.7                         |

"# of matched signals": number of unknown or unshared known signals matched; "# of matches": number of shared known metabolites matched; "# correct" and "% correct": number and percentage of correct matches; "#  $r^2 > 0.8$ " and "%  $r^2 > 0.8$ ": number and percentage of matches strongly correlated ( $r^2 > 0.8$ ) with the correct known in observed data; "%  $r^2 > 0.8$  for incorrect": percentage of incorrect matches strongly correlated with the correct known. "IMP": m/z and imputation-based matching; "RT": m/z and retention time-based matching; "N/A": not applicable. See Methods for detailed parameter explanations. Analyses that used the matching results: <sup>a</sup> matching validation; <sup>b</sup> GWAS replication and meta-analysis; <sup>c</sup> BMI-associated signal replication; <sup>d</sup> pathway validation; <sup>e</sup> BMI pathway analysis.
