# Supplementary material for: PAIRUP-MS: Pathway analysis and imputation to relate unknowns in profiles from mass spectrometry-based metabolite data
Source: PLoS Comput Biol. 2019 Jan 14;15(1):e1006734. doi: 10.1371/journal.pcbi.1006734 (PMC6347288; doi:10.1371/journal.pcbi.1006734)
Supplement: S6 Table — “Potential identity”, “Chemical formula”, “Adduct”, and “HMDB ID” information was retrieved by performing m/z query in HMDB (see Methods). (XLSX) [file pcbi.1006734.s017.xlsx]

## Sheet: S6 Table
S6 Table. Potential identities of unknown signals associated with rs5030858 (PAH), rs36004833 (SLC13A4), or rs11657051 (ARSG) loci.
Locus	Associated unknown signals	m/z	RT (min)	Potential identity (best m/z match in HMDB, ± 1 ppm)	Chemical formula	Adduct	HMDB ID
rs5030858 (PAH)	HILIC-pos_QI714	120.081	6.77	(No match)
	HILIC-pos_QI730	121.084	6.77	Calycanthidine	C23H28N4	M+3H	HMDB0030281
	HILIC-pos_QI888	131.053	8.11	N-Desmethyleletriptan	C21H24N2O2S	M+2H+Na	HMDB0013919
	HILIC-pos_QI1283	149.06	6.77	Cinnamic acid	C9H8O2	M+H	HMDB0000567
				Di-2-furanylmethane	C9H8O2	M+H	HMDB0032947
				3,4-Dihydro-2H-1-benzopyran-2-one	C9H8O2	M+H	HMDB0036626
				4'-Hydroxy-R-phenprocoumon	C18H16O4	M+2H	HMDB0060885
				8-Hydroxy-R-phenprocoumon	C18H16O4	M+2H	HMDB0060887
				7-Hydroxy-R-phenprocoumon	C18H16O4	M+2H	HMDB0060888
				6-Hydroxy-R-phenprocoumon	C18H16O4	M+2H	HMDB0060886
				1-Phenyl-1,2-propanedione	C9H8O2	M+H	HMDB0035243
				Desmosflavone	C18H16O4	M+2H	HMDB0038518
				trans-Cinnamic acid	C9H8O2	M+H	HMDB0000930
				(E)-3-(4-Hydroxyphenyl)-2-propenal	C9H8O2	M+H	HMDB0040986
				1-(4-Hydroxy-3-methoxyphenyl)-5-(4-hydroxyphenyl)-1,4-pentadien-3-one	C18H16O4	M+2H	HMDB0040931
				Dimethylstrobochrysin	C18H16O4	M+2H	HMDB0040873
				(E)-3-(2-Hydroxyphenyl)-2-propenal	C9H8O2	M+H	HMDB0031725
				Demethoxyegonol	C18H16O4	M+2H	HMDB0030772
				3-(4-hydroxyphenyl)prop-2-enal	C9H8O2	M+H	HMDB0135648
				(2Z)-2-hydroxy-3-phenylprop-2-enal	C9H8O2	M+H	HMDB0135273
				(2E)-3-(3-hydroxyphenyl)prop-2-enal	C9H8O2	M+H	HMDB0135274
				3-phenyloxirane-2-carbaldehyde	C9H8O2	M+H	HMDB0135275
				3-phenylprop-2-enoic acid	C9H8O2	M+H	HMDB0128078
				3-(2-hydroxyphenyl)prop-2-enal	C9H8O2	M+H	HMDB0134039
	HILIC-pos_QI1688	167.09	6.77	2-Methyladipic acid	C7H12O4	M+Li	HMDB0029167
				2,2-Dimethylglutaric acid	C7H12O4	M+Li	HMDB0061676
				2-Ethylglutaric acid	C7H12O4	M+Li	HMDB0059738
				Pimelic acid	C7H12O4	M+Li	HMDB0000857
				3-Methyladipic acid	C7H12O4	M+Li	HMDB0000555
				3,3-Dimethylglutaric acid	C7H12O4	M+Li	HMDB0002441
				Diethyl malonate	C7H12O4	M+Li	HMDB0029573
				Mono-methyl-adipate	C7H12O4	M+Li	HMDB0059722
				Ethyl methyl_succinate	C7H12O4	M+Li	HMDB0059893
				Propyleneglycol diacetate	C7H12O4	M+Li	HMDB0041605
	HILIC-pos_QI2642	210.05	6.78	5-(3-Pyridyl)-2-hydroxytetrahydrofuran	C9H11NO2	M+2Na-H	HMDB0062407
				Methyl N-methylanthranilate	C9H11NO2	M+2Na-H	HMDB0034169
				Norsalsolinol	C9H11NO2	M+2Na-H	HMDB0006044
				3-Pyridinebutanoic acid	C9H11NO2	M+2Na-H	HMDB0001007
				Benzocaine	C9H11NO2	M+2Na-H	HMDB0004992
				L-Phenylalanine	C9H11NO2	M+2Na-H	HMDB0000159
				Gentiatibetine	C9H11NO2	M+2Na-H	HMDB0033485
				4-Hydroxy-1-(3-pyridinyl)-1-butanone	C9H11NO2	M+2Na-H	HMDB0062402
				Benzyl glycinate	C9H11NO2	M+2Na-H	HMDB0059934
				Ethyl 2-aminobenzoate	C9H11NO2	M+2Na-H	HMDB0033589
	HILIC-pos_QI4021	295.066	4.91	6-(1-carboxy-2-methoxy-2-oxoethyl)-3,4,5-trihydroxyoxane-2-carboxylic acid	C10H14O10	M+H	HMDB0130027
				3,4,5-trihydroxy-6-[(3-methoxy-3-oxopropanoyl)oxy]oxane-2-carboxylic acid	C10H14O10	M+H	HMDB0130026
				Allopurinol	C5H4N4O	2M+Na	HMDB0014581
				Hypoxanthine	C5H4N4O	2M+Na	HMDB0000157
	HILIC-pos_QI4616	347.034	8.01	(No match)
	HILIC-pos_QI5503	460.022	7.99	(No match)
	C18-neg_QI3308	327.218	8.16	(9R,10S,12Z)-9,10-Dihydroxy-8-oxo-12-octadecenoic acid	C18H32O5	M-H	HMDB0040611
				Auxin a	C18H32O5	M-H	HMDB0038483
				Corchorifatty acid F	C18H32O5	M-H	HMDB0035919
rs36004833 (SLC13A4)	HILIC-pos_QI989	136.048	8.39	Creatinine	C4H7N3O	M+Na	HMDB0000562
	HILIC-pos_QI1391	154.059	8.39	Creatine	C4H9N3O2	M+Na	HMDB0000064
				Beta-Guanidinopropionic acid	C4H9N3O2	M+Na	HMDB0013222
				Formamide	CH3NO	2M+ACN+Na	HMDB0001536
				(aminomethyl)carbamic acid	C2H6N2O2	M+ACN+Na	HMDB0143050
	HILIC-pos_QI1413	155.062	8.39	(No match)
	HILIC-pos_QI3580	263.146	8.39	Creatine	C4H9N3O2	2M+H	HMDB0000064
				Beta-Guanidinopropionic acid	C4H9N3O2	2M+H	HMDB0013222
				Momordin I	C41H64O13	M+2H+Na	HMDB0036358
				28-Glucosyl-3b,23-dihydroxy-12,19(29)-ursadien-28-oate 3-arabinoside	C41H64O13	M+2H+Na	HMDB0037643
				Digitoxin	C41H64O13	M+2H+Na	HMDB0015468
	HILIC-pos_QI3894	285.128	8.38	Creatine	C4H9N3O2	2M+Na	HMDB0000064
				Beta-Guanidinopropionic acid	C4H9N3O2	2M+Na	HMDB0013222
	HILIC-pos_QI4172	307.11	8.39	Neohesperidin dihydrochalcone	C28H36O15	M+2H	HMDB0030542
	HILIC-pos_QI5203	416.198	8.38	Canavanine	C5H12N4O3	2M+ACN+Na	HMDB0002706
rs11657051 (ARSG)	HILIC-pos_QI742	122.925	7.65	(No match)
	HILIC-pos_QI777	124.923	7.65	(No match)
	HILIC-pos_QI2574	206.886	7.65	Chlorate	ClH3O3	2M+K	HMDB0002036
	HILIC-pos_QI2618	208.884	7.65	(No match)
	HILIC-pos_QI2655	210.882	7.65	(No match)
	HILIC-pos_QI2842	222.988	8.1	L-Glutamine	C5H10N2O3	M+2K-H	HMDB0000641
				Ureidoisobutyric acid	C5H10N2O3	M+2K-H	HMDB0002031
				D-Glutamine	C5H10N2O3	M+2K-H	HMDB0003423
				Alanylglycine	C5H10N2O3	M+2K-H	HMDB0006899
	HILIC-pos_QI3971	290.847	7.65	(No match)
	HILIC-pos_QI3992	292.845	7.65	(No match)
	HILIC-pos_QI4903	374.808	7.65	(No match)
	HILIC-pos_QI4939	378.805	7.65	(No match)
	HILIC-pos_QI5496	458.77	7.65	(No match)
	HILIC-pos_QI5509	460.768	7.65	(No match)
	HILIC-pos_QI5528	462.766	7.65	(No match)
	HILIC-pos_QI5995	542.731	7.65	(No match)
	HILIC-pos_QI6003	544.729	7.65	(No match)
	HILIC-pos_QI6017	546.727	7.65	(No match)
	HILIC-pos_QI6397	612.716	7.64	(No match)
	HILIC-pos_QI6473	626.692	7.65	(No match)
	HILIC-pos_QI6484	628.691	7.65	(No match)
	HILIC-pos_QI6493	630.688	7.65	(No match)
	HILIC-pos_QI6735	696.678	7.64	(No match)
	HILIC-pos_QI6794	710.654	7.65	N-(14-Methylhexadecanoyl)pyrrolidine	C21H41NO	2M+ACN+Na	HMDB0034373
	HILIC-pos_QI6805	712.652	7.65	(No match)
	HILIC-pos_QI6820	714.65	7.65	(No match)
	HILIC-pos_QI7157	794.615	7.65	SM(d18:1/18:0)	C41H84N2O6P	M+ACN+Na	HMDB0001348
	HILIC-pos_QI7174	796.613	7.65	(No match)
